# Supplementary material for: An umpolung reaction of α-iminothioesters possessing a cyclopropyl group
Source: Royal Society of Chemistry journal article supplement (doi:10.1039/d0ra01152e), 2020-01-01
Supplement: d0ra01152e1.pdf [file d0ra01152e1.pdf]

## Supporting Information

### An umpolung reaction of $\alpha$ -iminothioesters possessing a cyclopropyl group

**Makoto Shimizu,<sup>\*a,b</sup> Takayoshi Morimoto,<sup>b</sup> Yusuke Yanagi,<sup>b</sup> Isao Mizota,<sup>b</sup> and Yusong Zhu<sup>a</sup>**

*<sup>a</sup>School of Energy Science and Engineering, Nanjing Tech University, Nanjing 211816, Jiangsu Province, China*

*<sup>b</sup>Department of Chemistry for Materials, Graduate School of Engineering, Mie University, Tsu, Mie 514-8507, Japan*

Copies of  $^1\text{H}$  and  $^{13}\text{C}$  NMR Spectra-----S2-S23

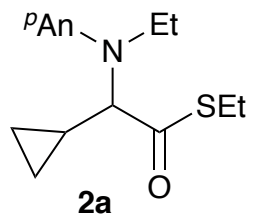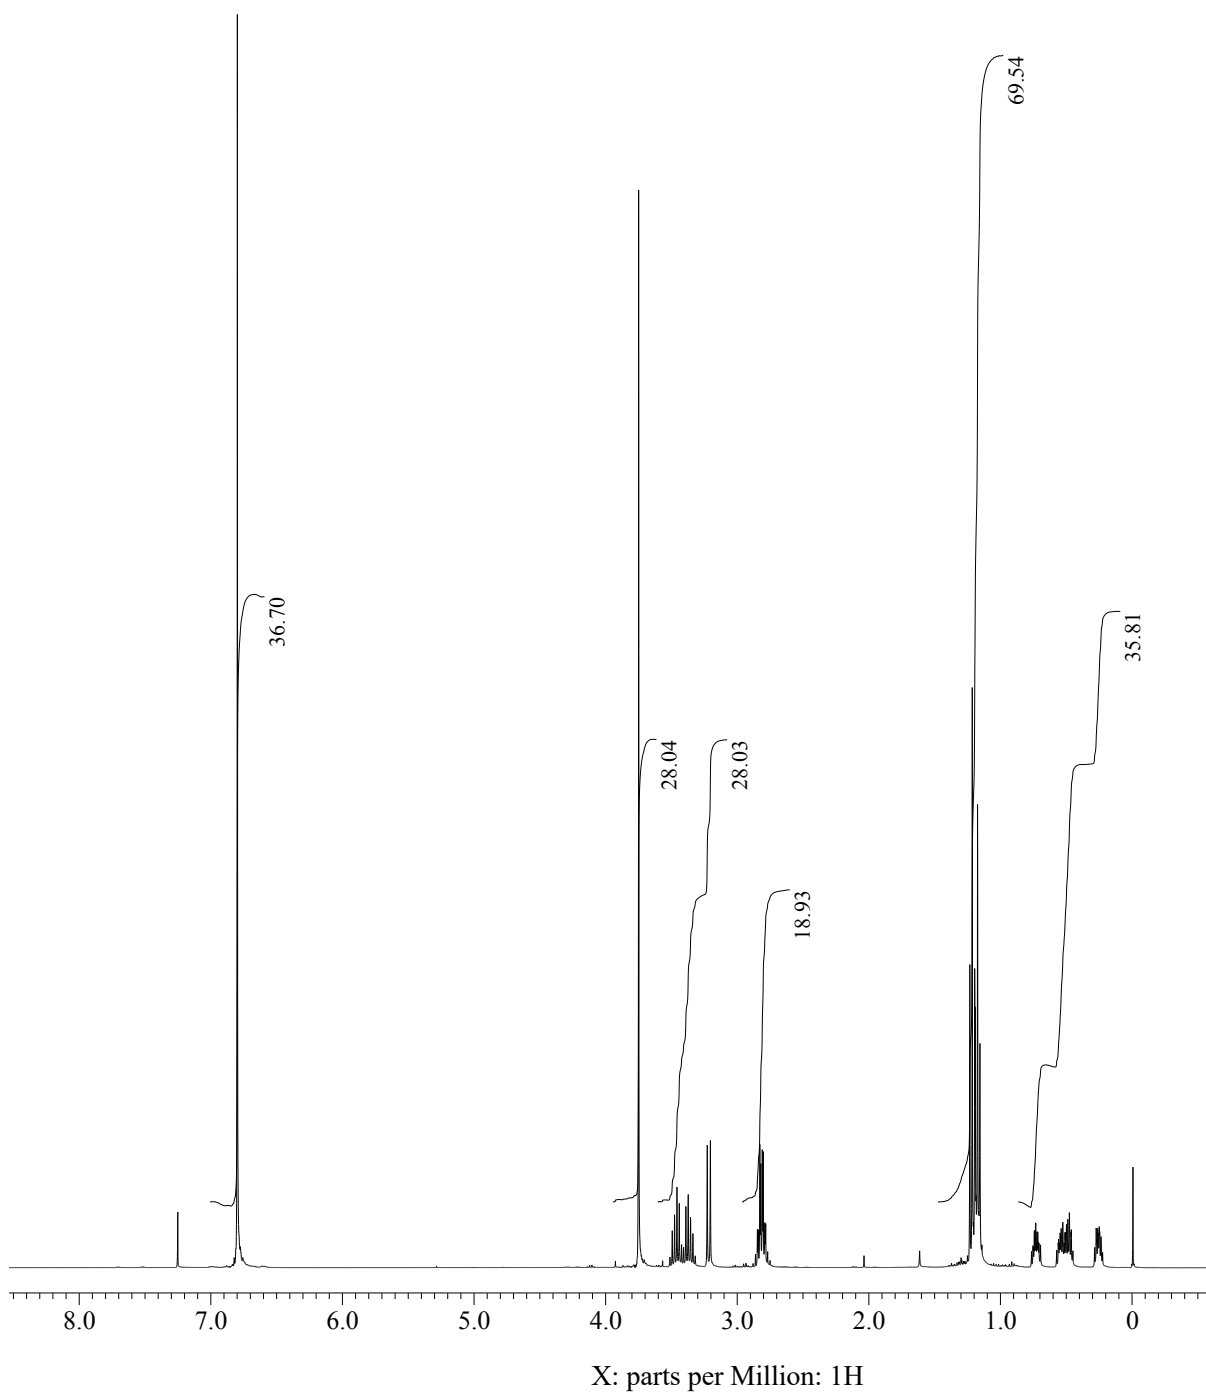

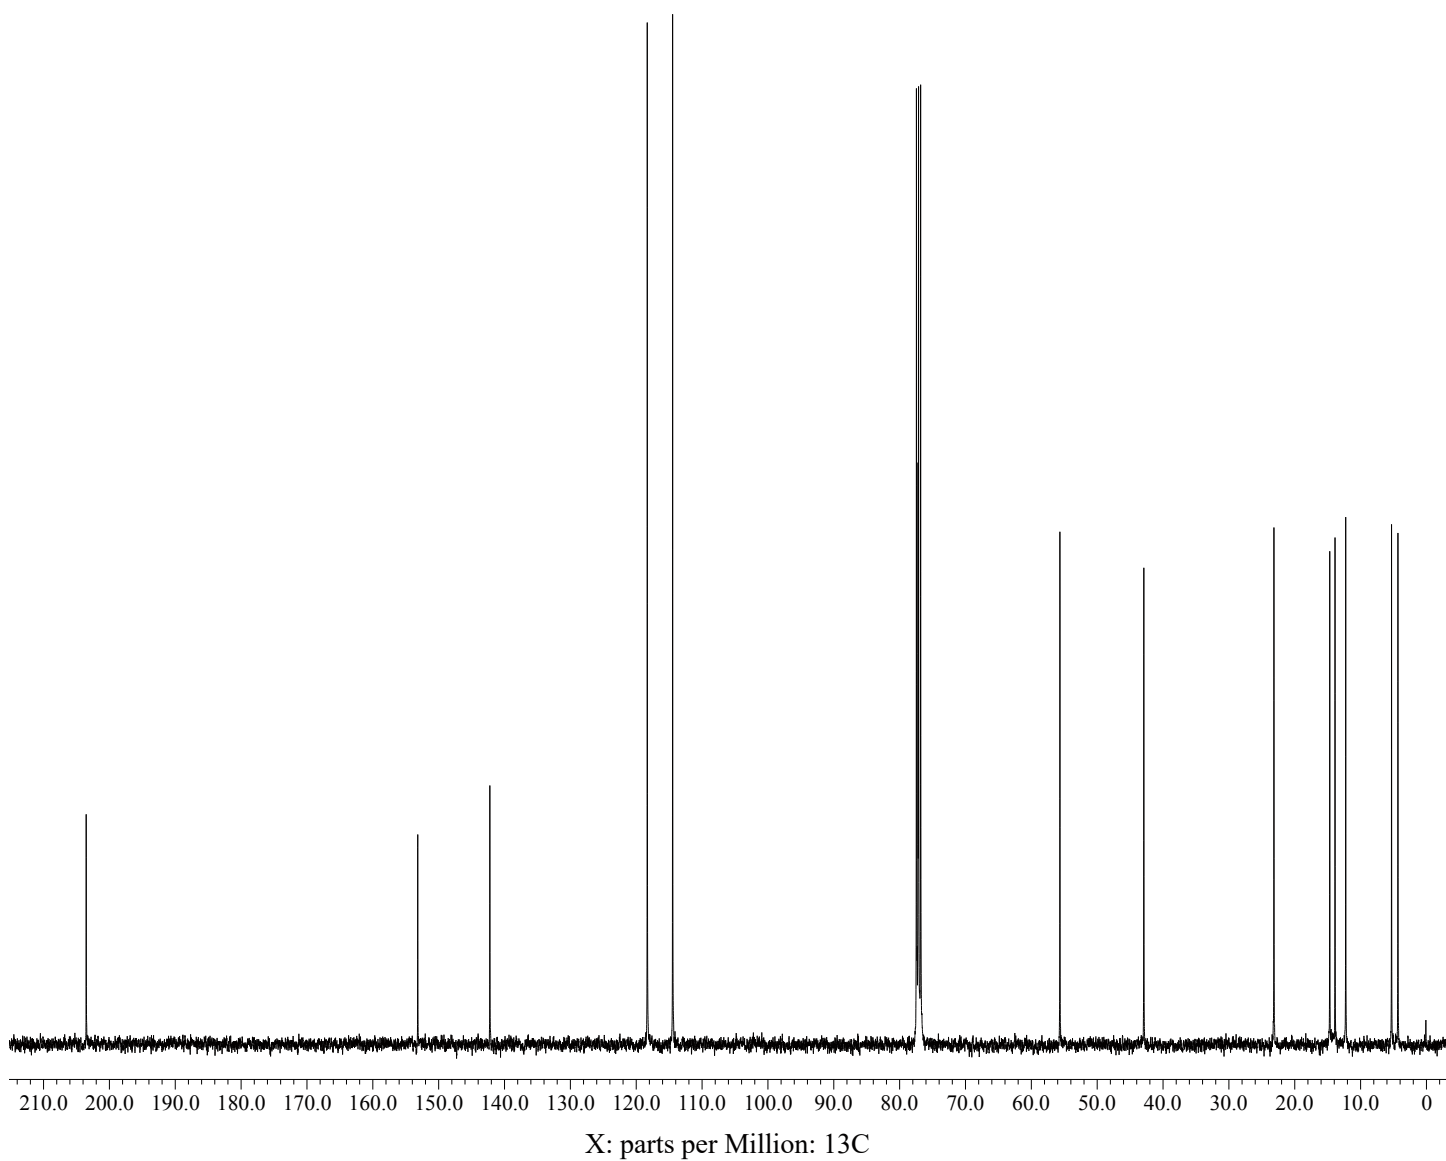

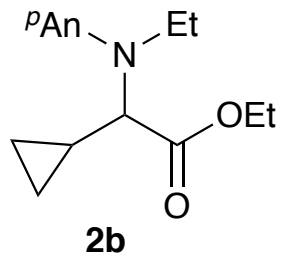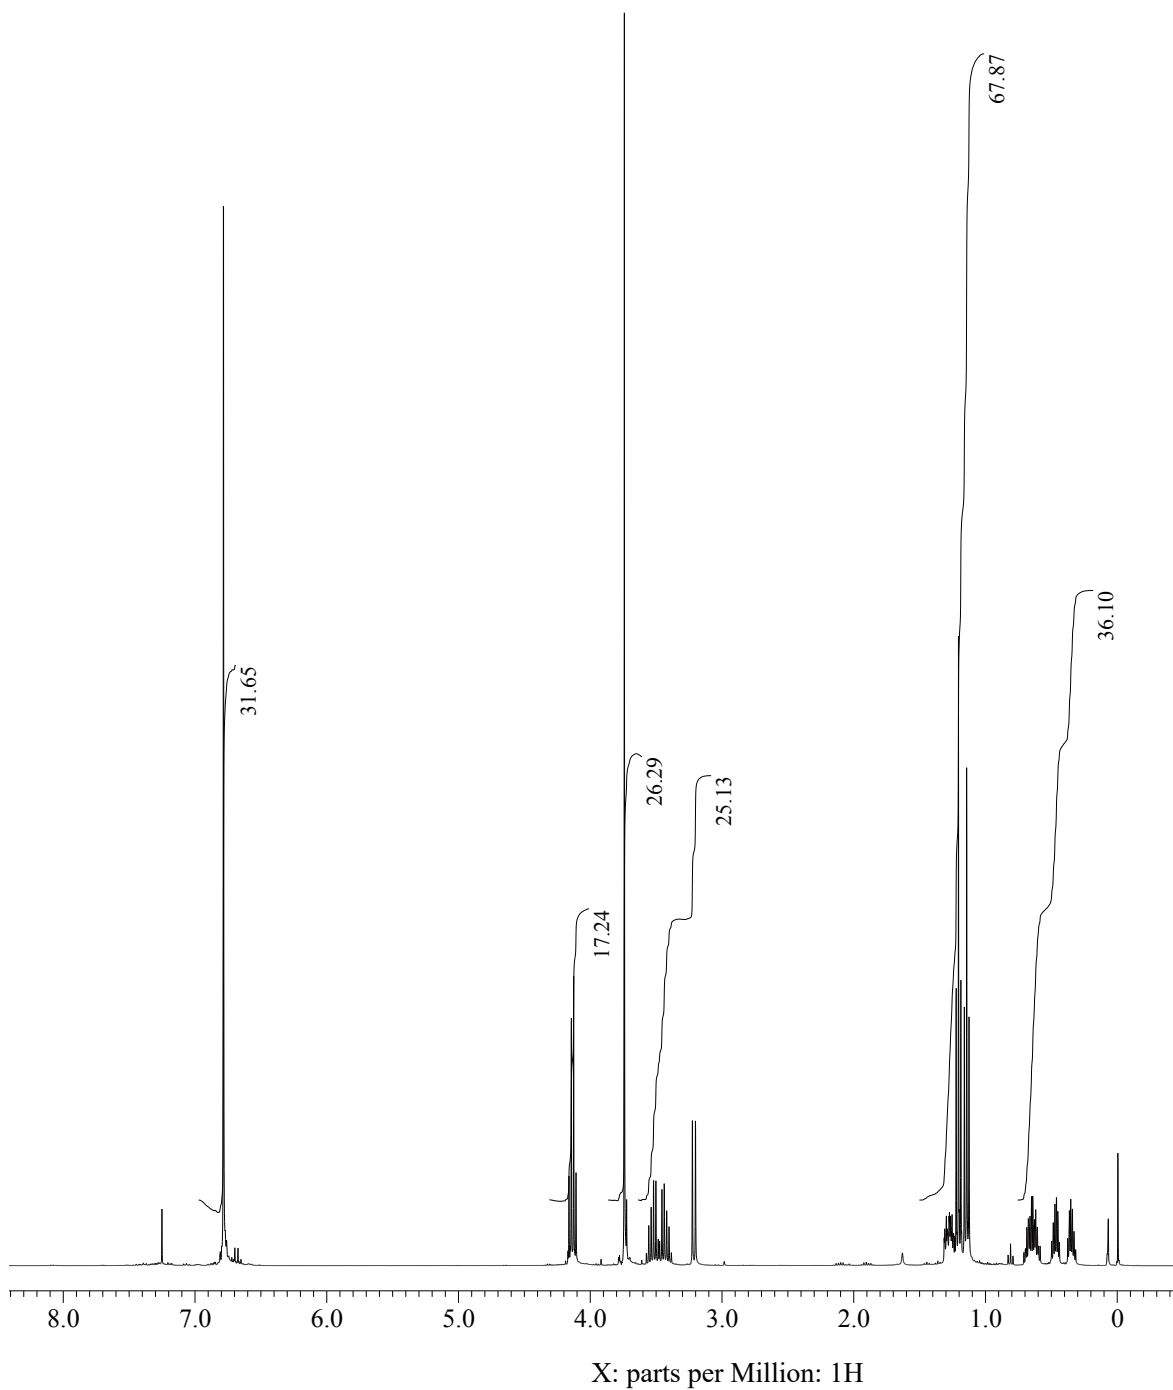

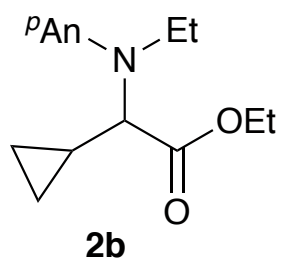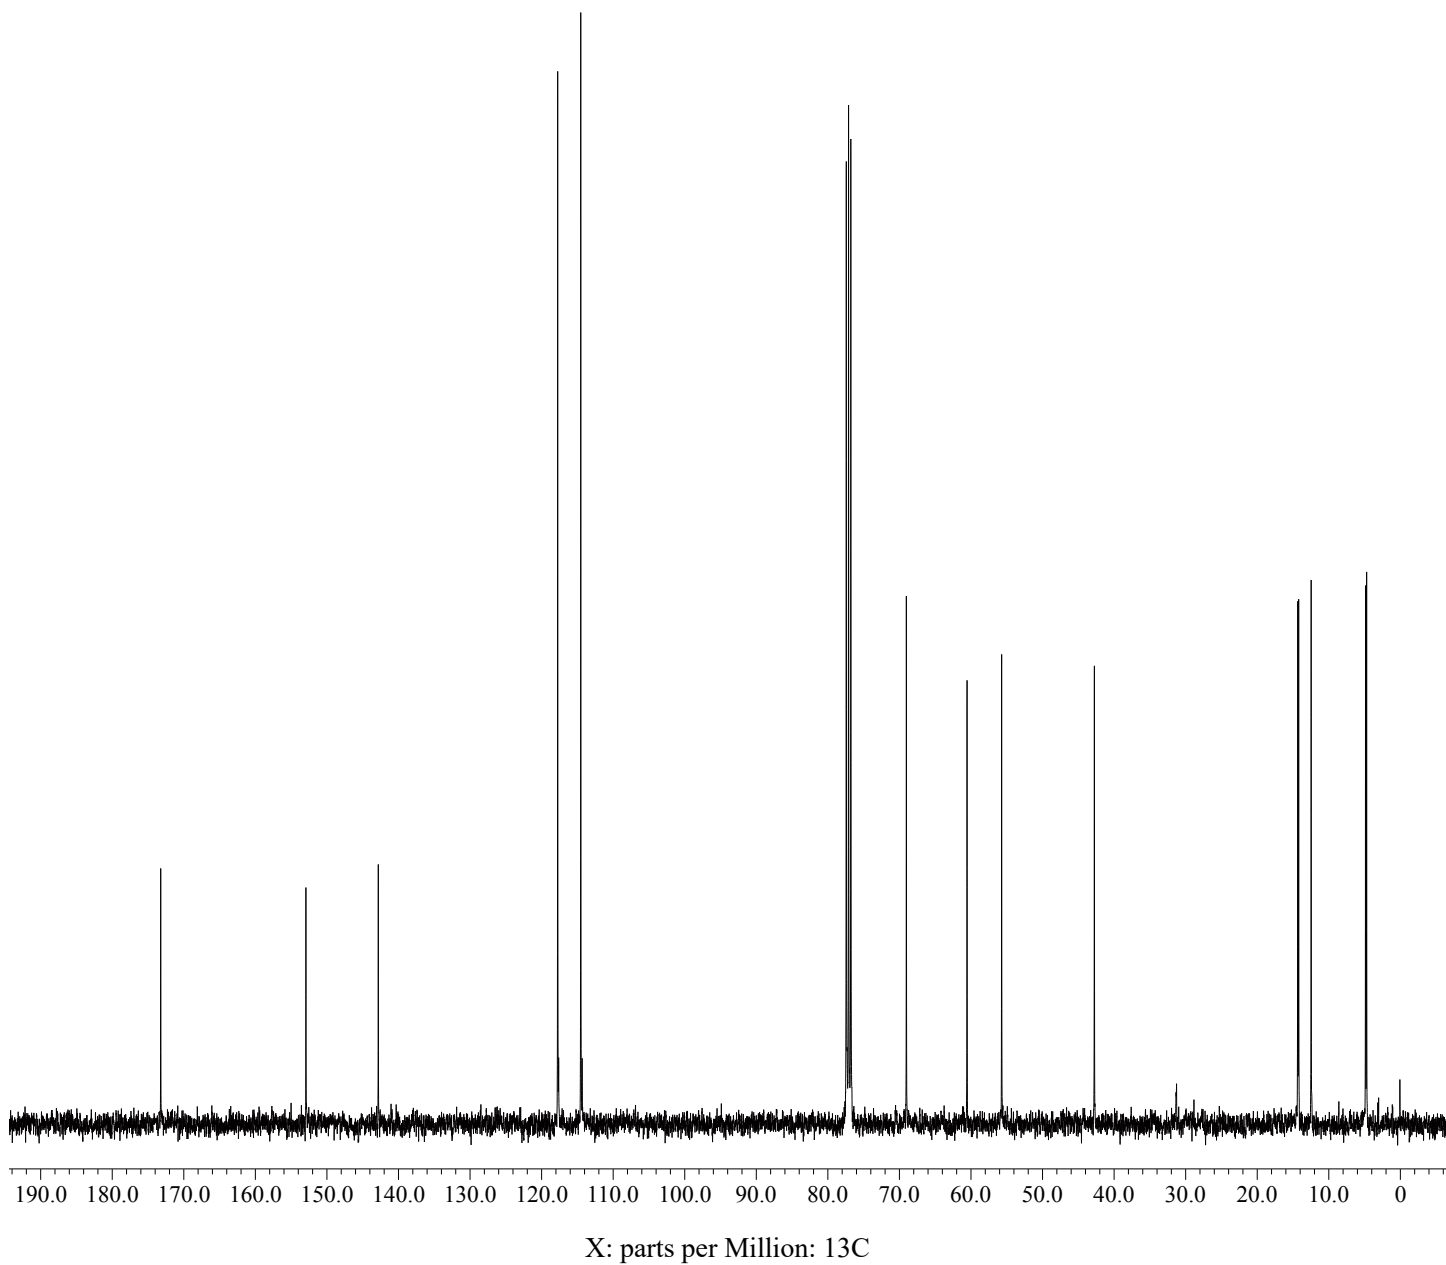

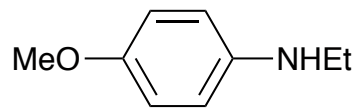

**3**

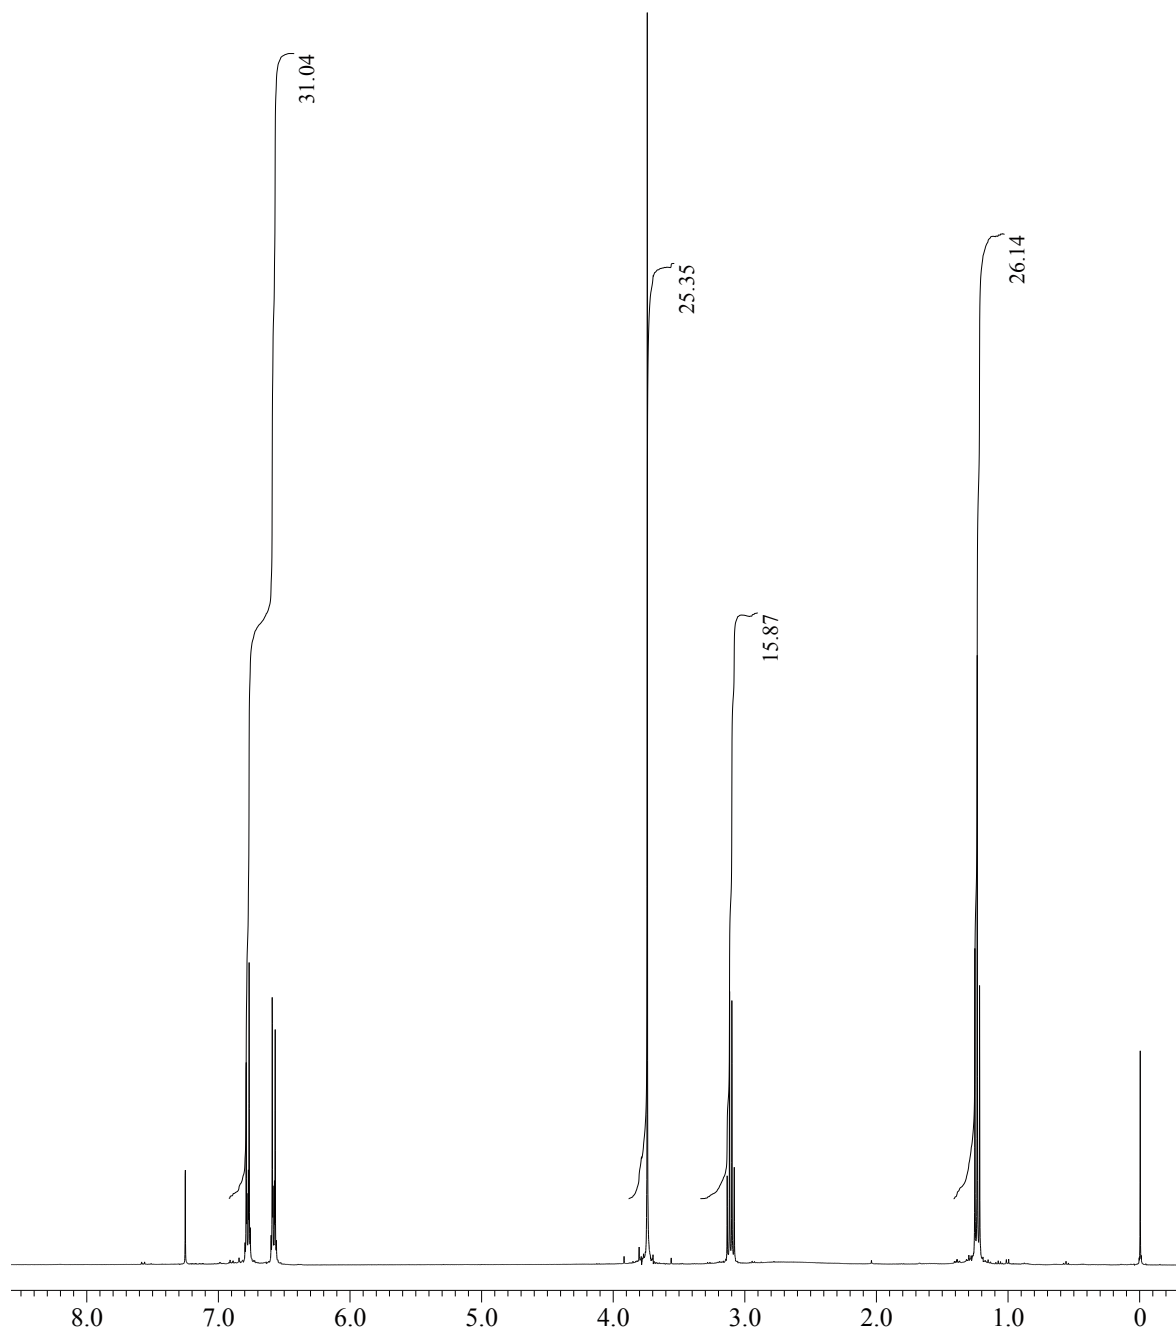

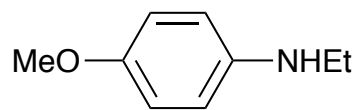

**3**

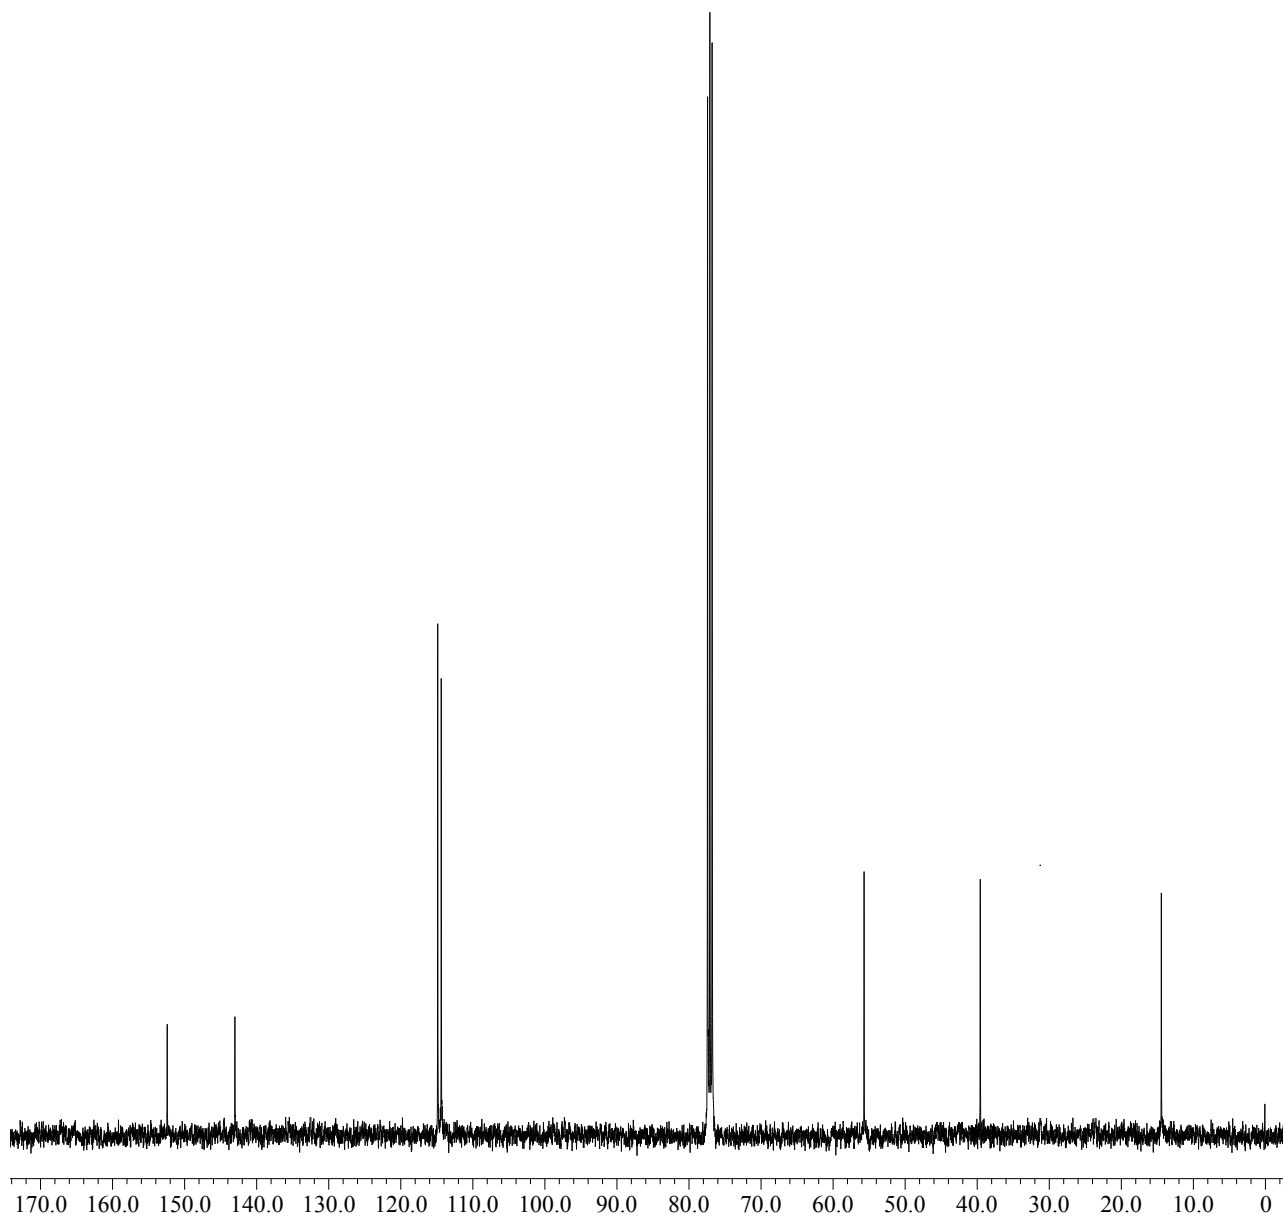

X: parts per Million: 13C

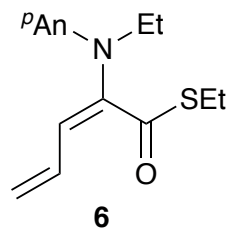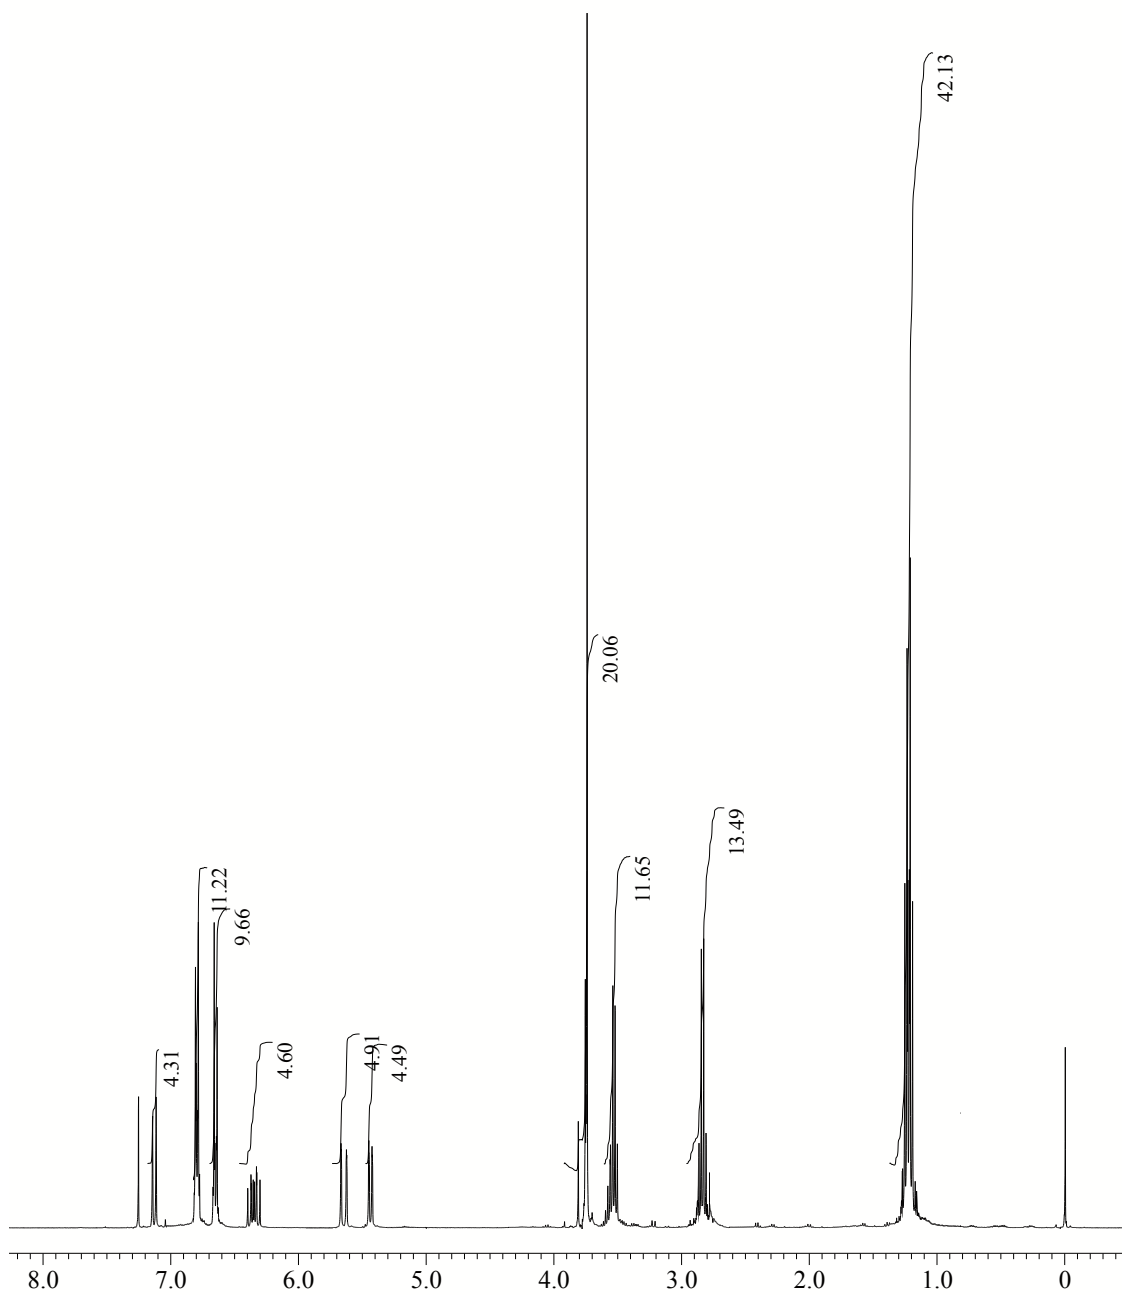

X: parts per Million: 1H



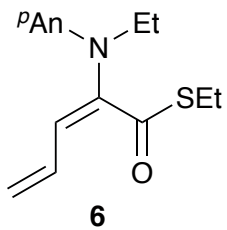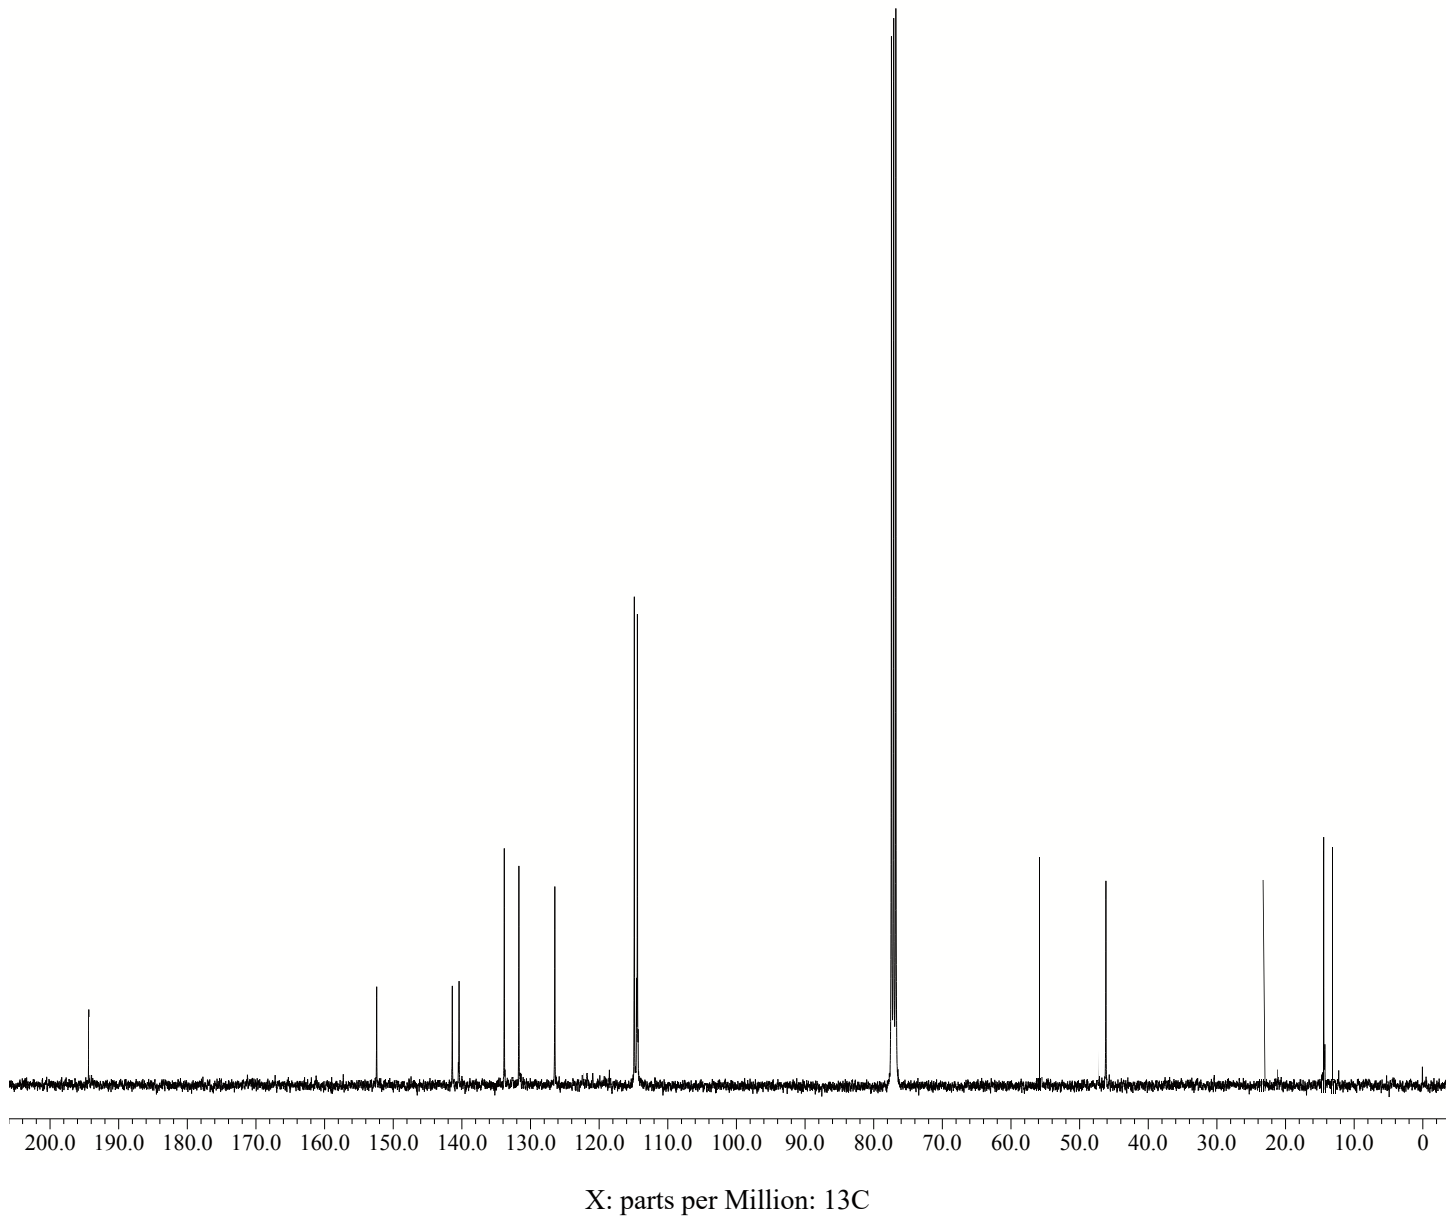

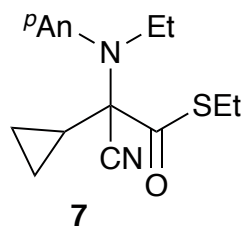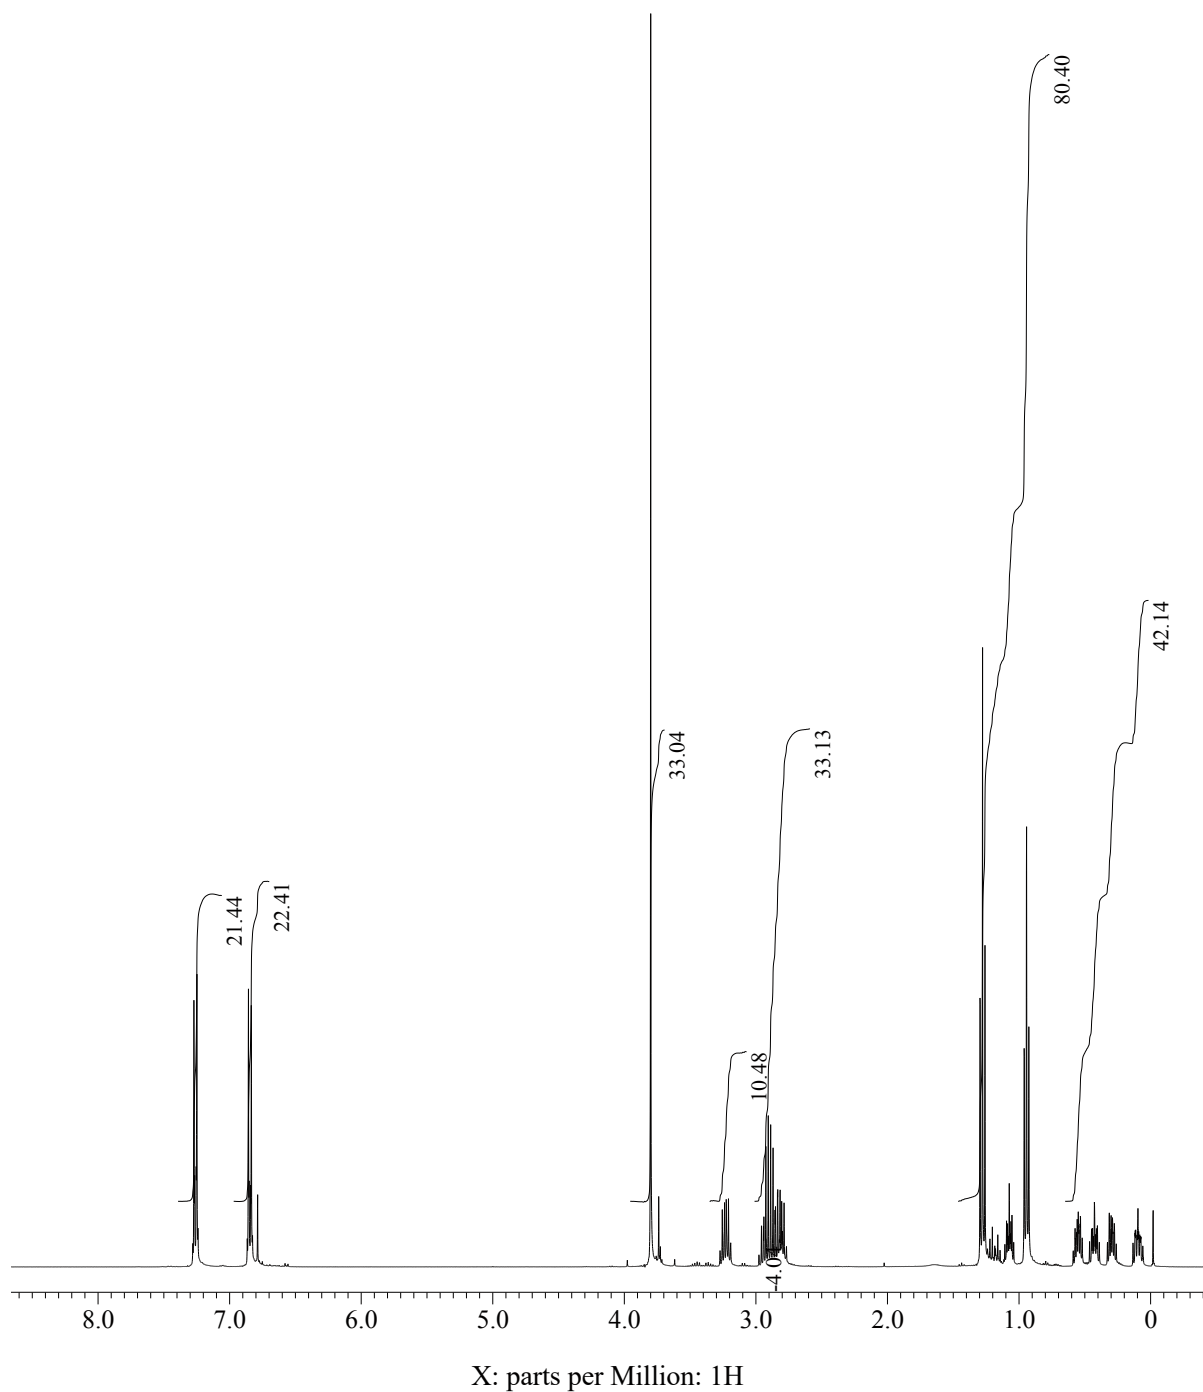

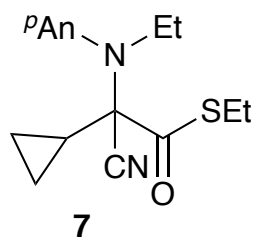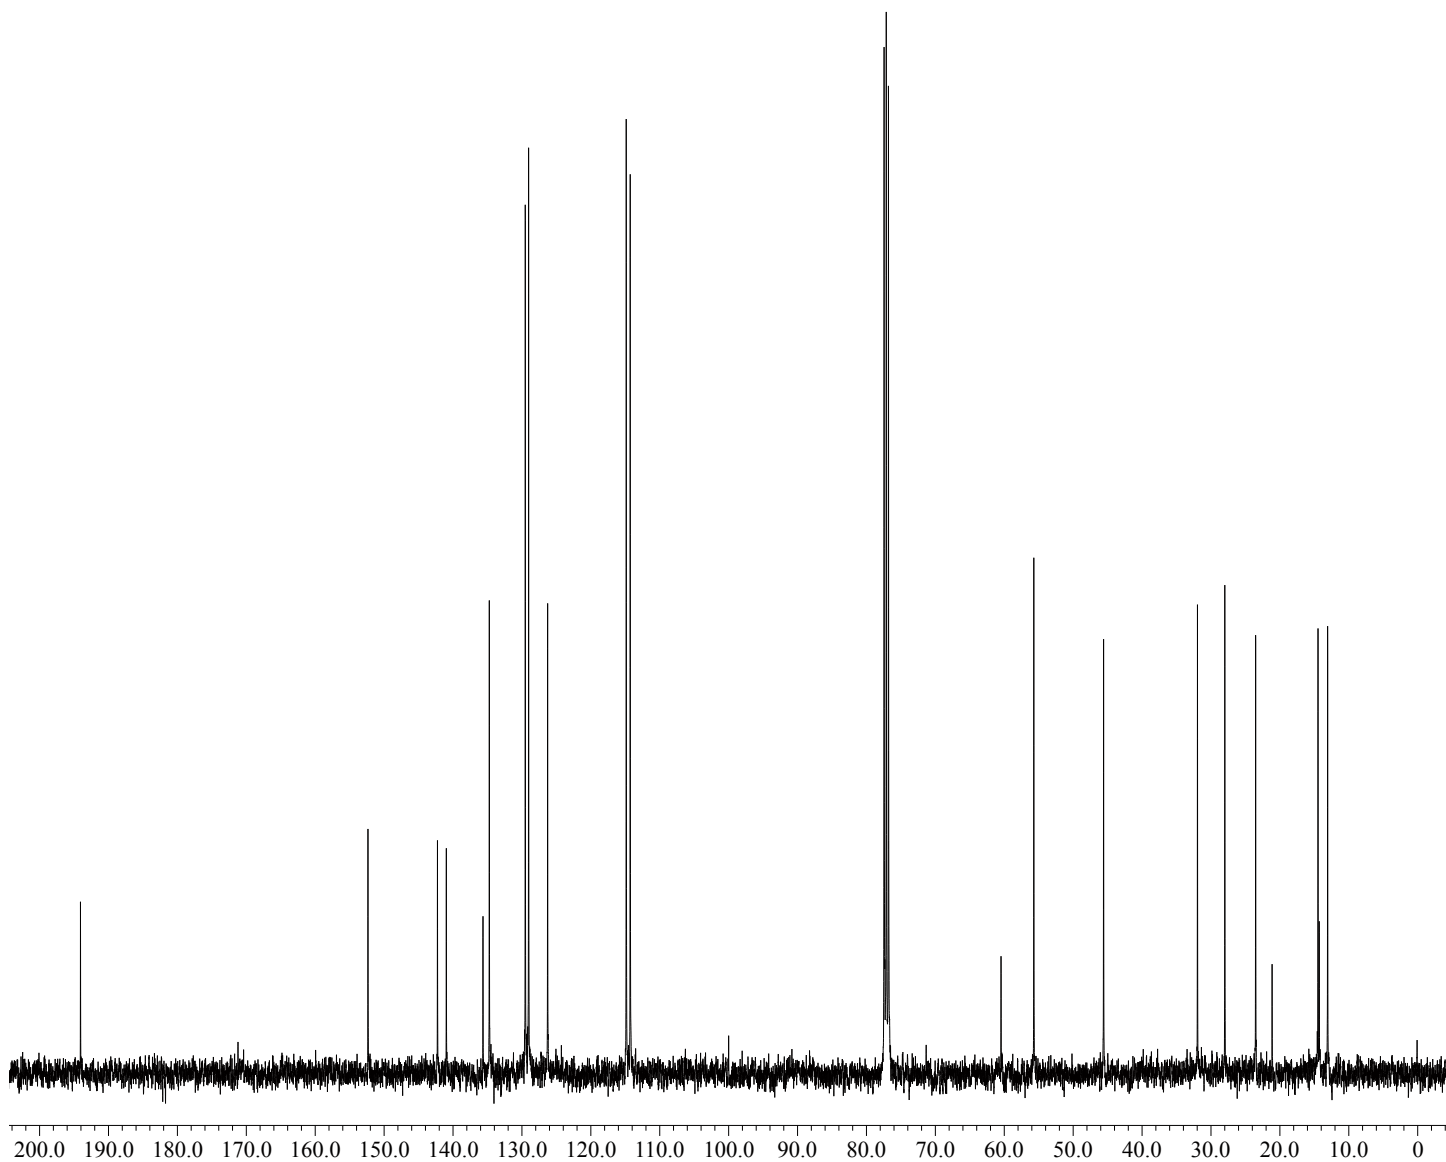

X: parts per Million: <sup>13</sup>C

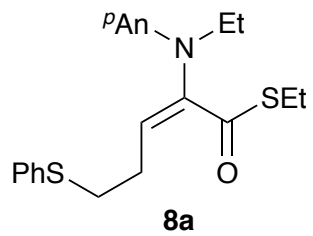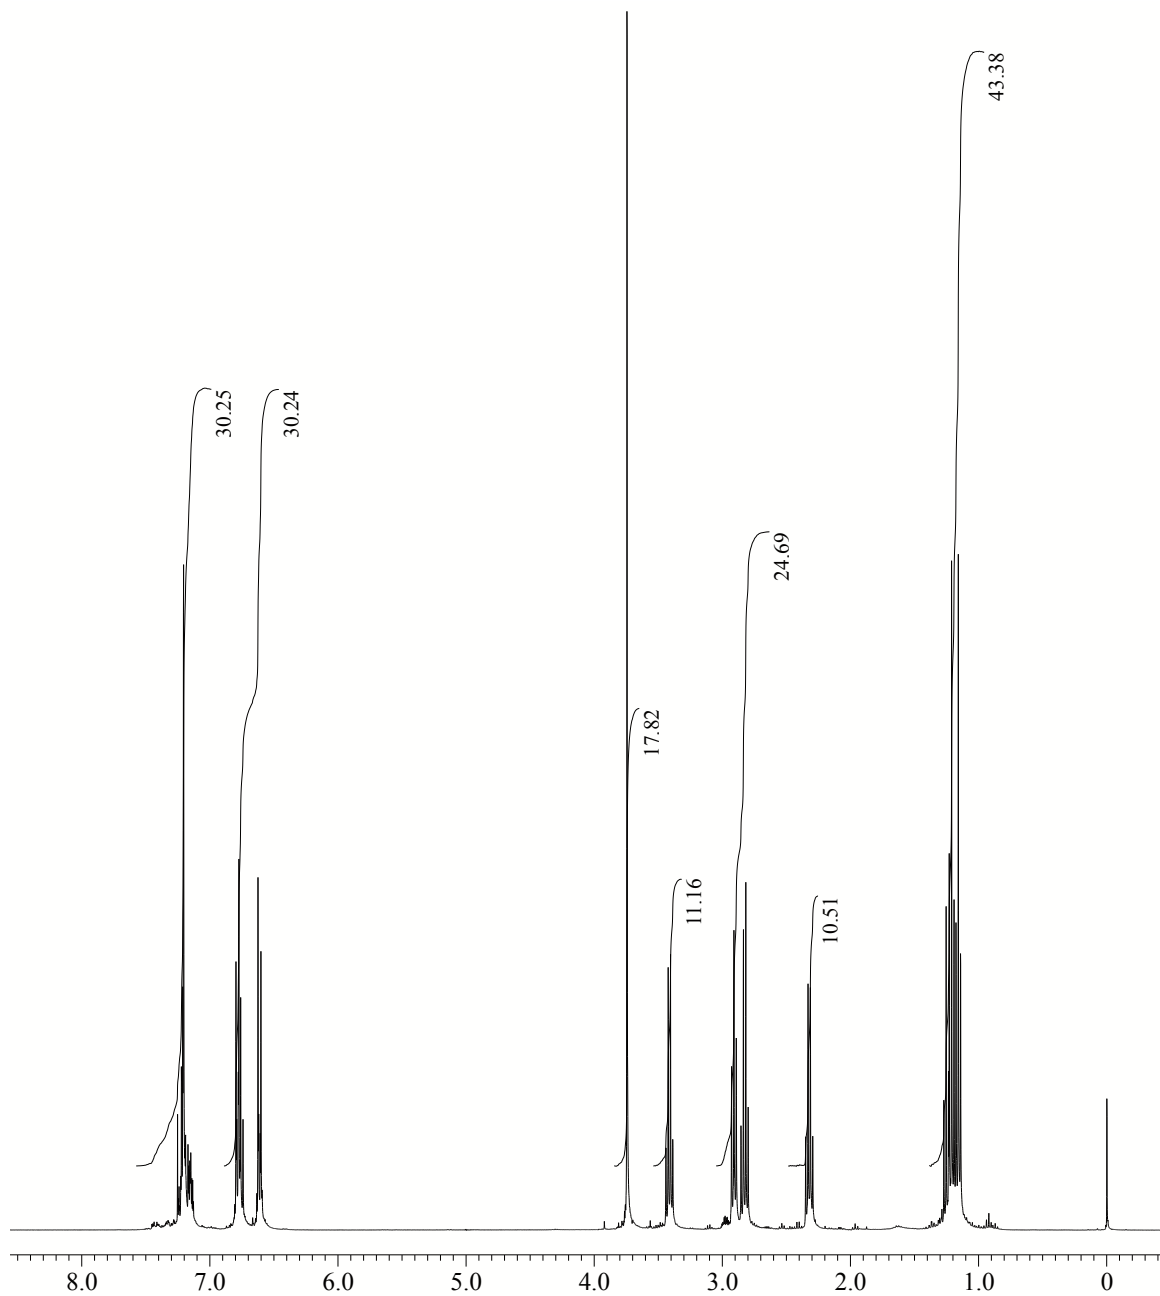

X: parts per Million: 1H

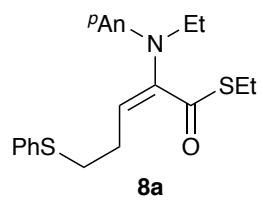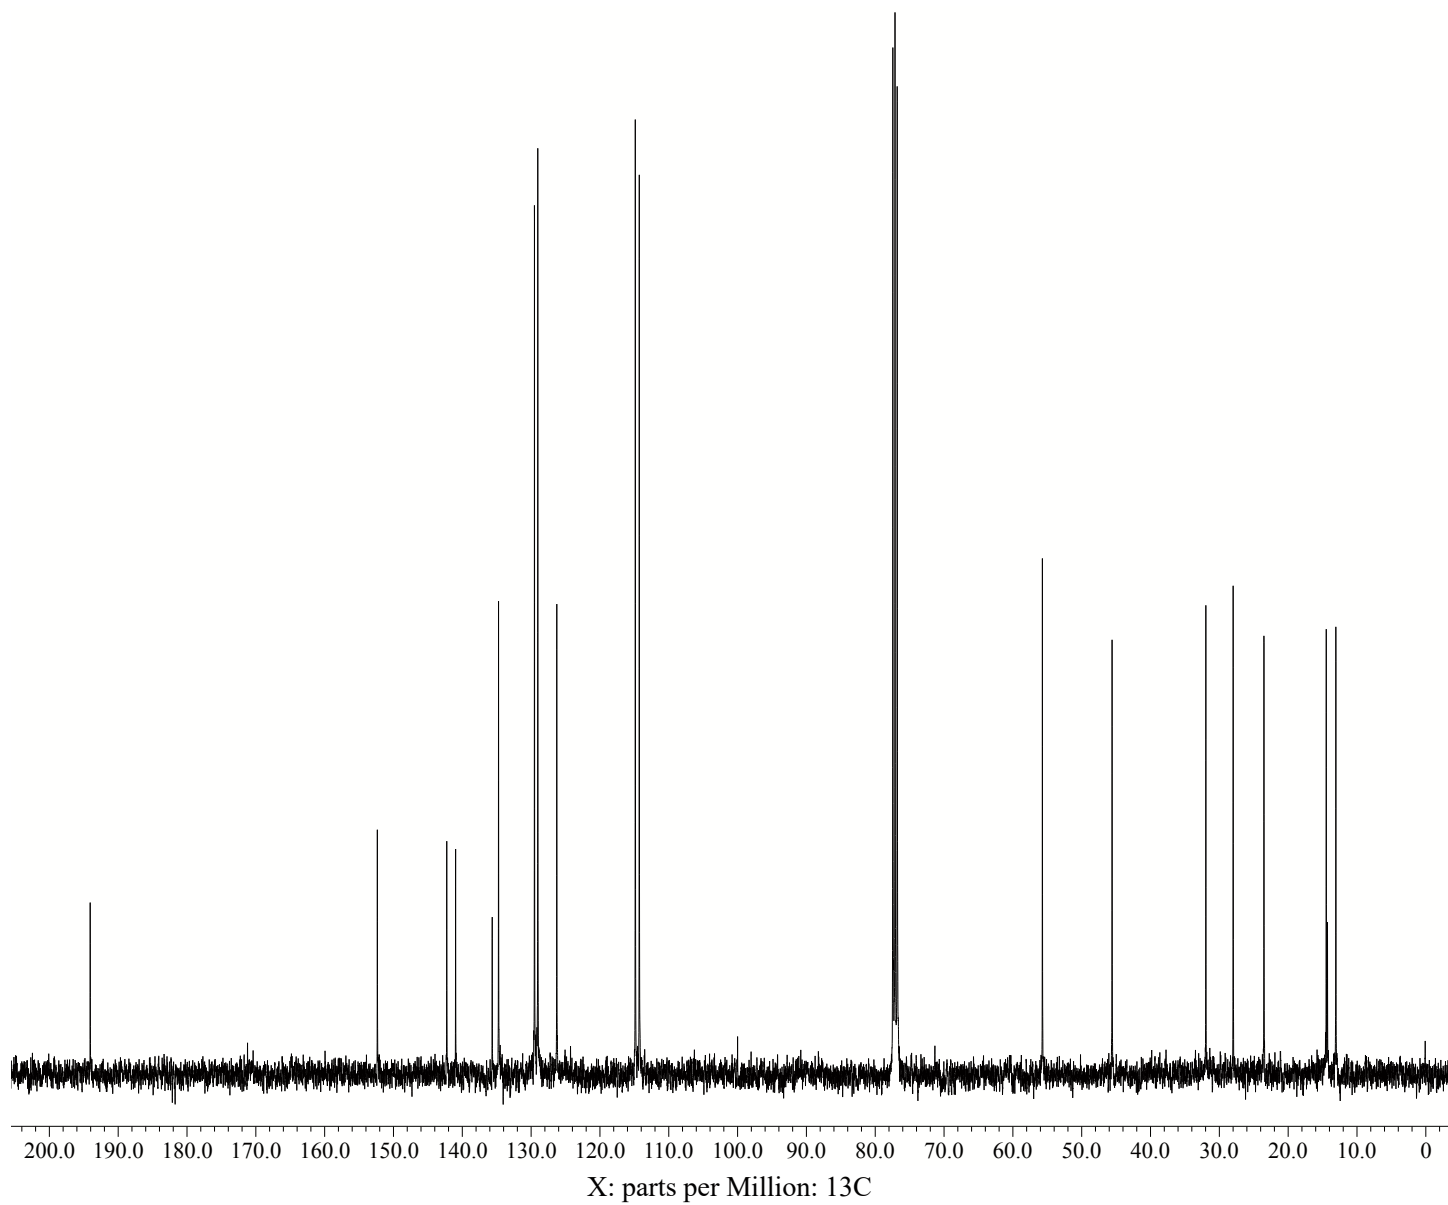

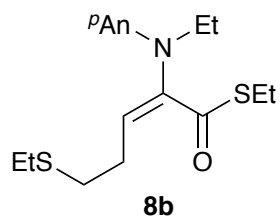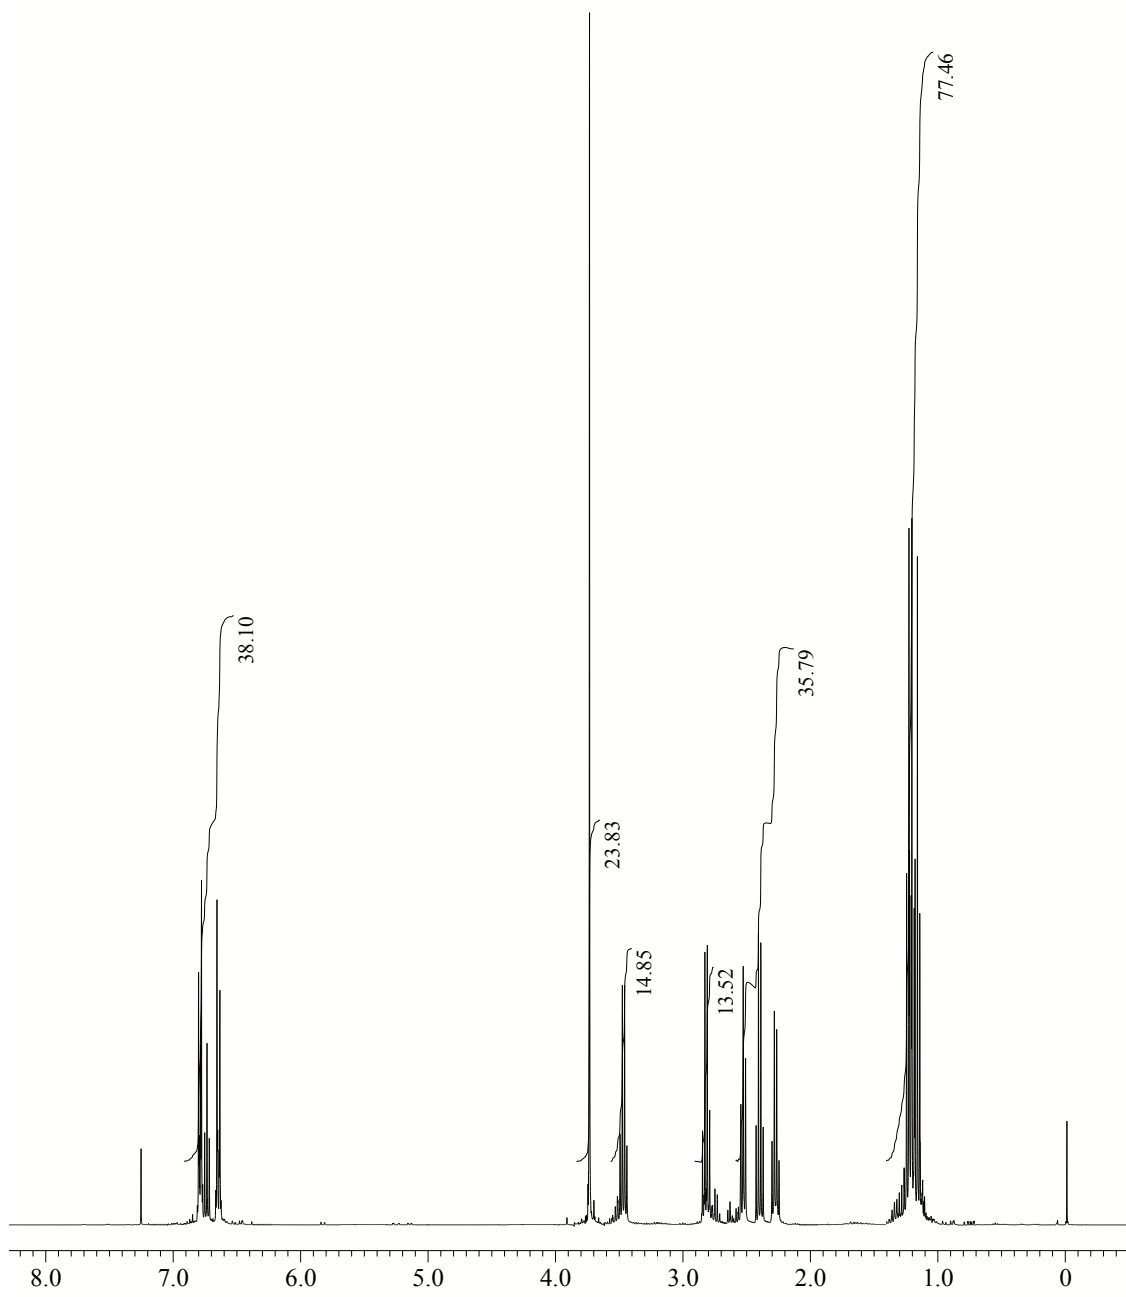

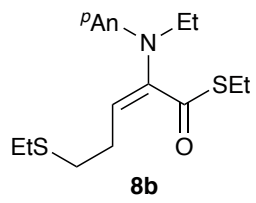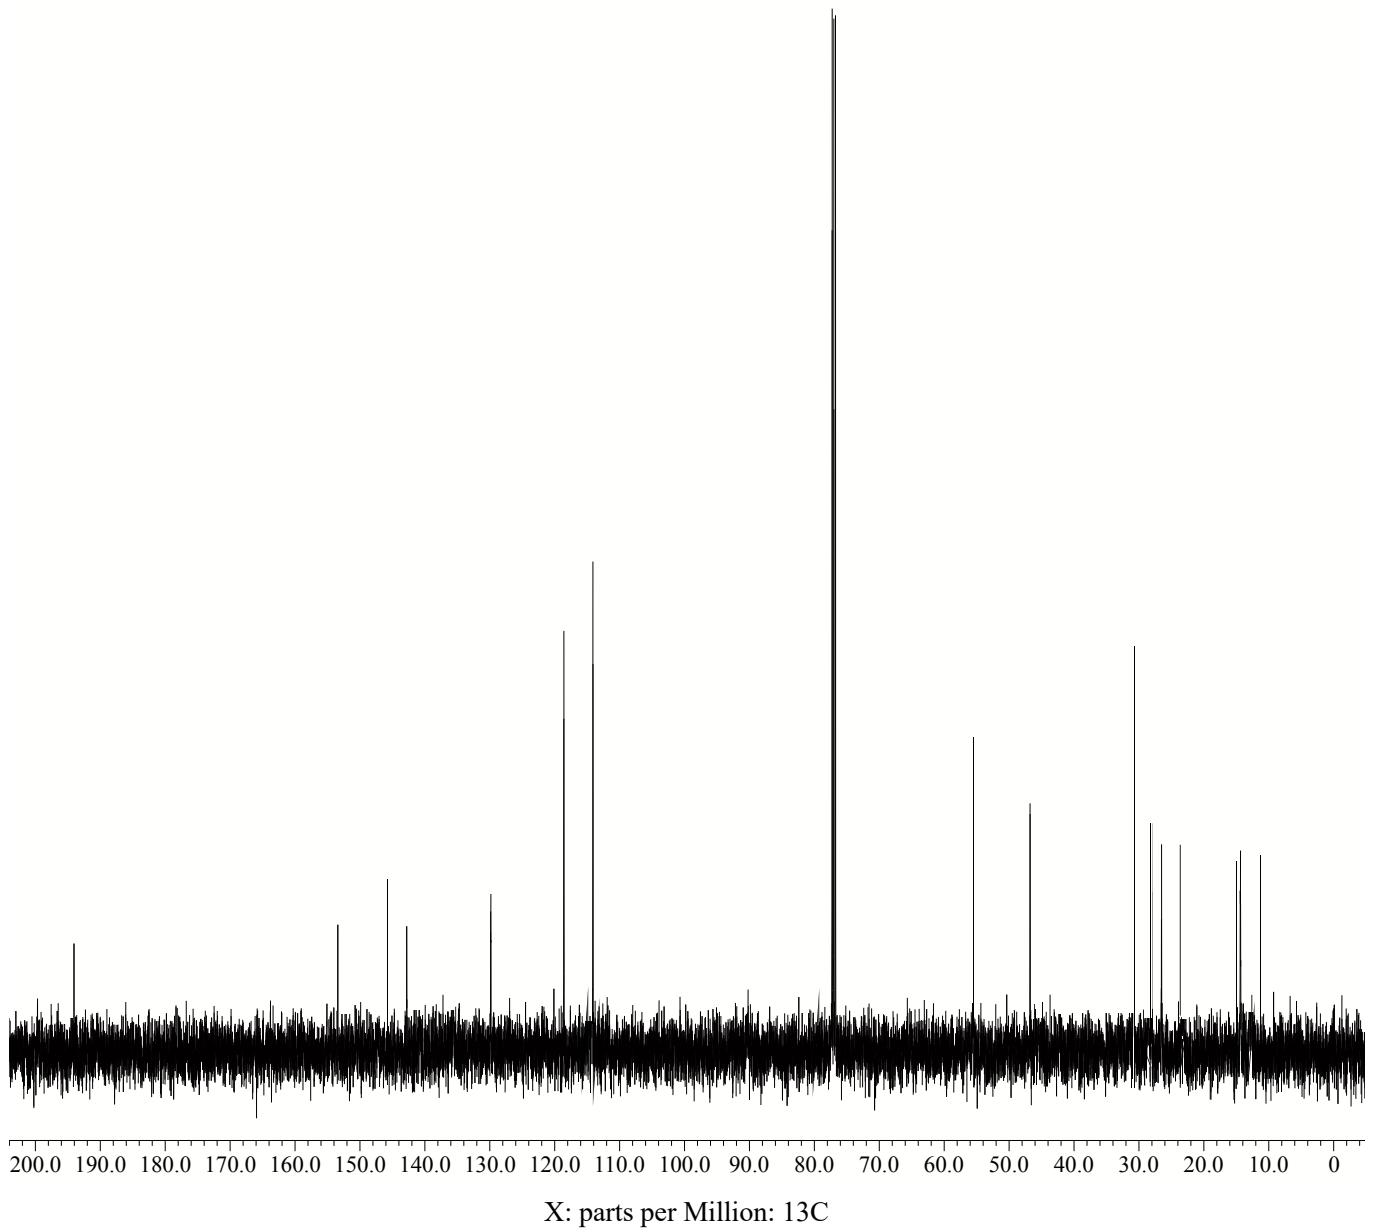

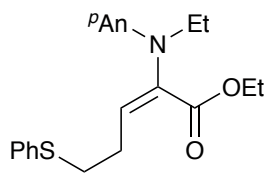

8c

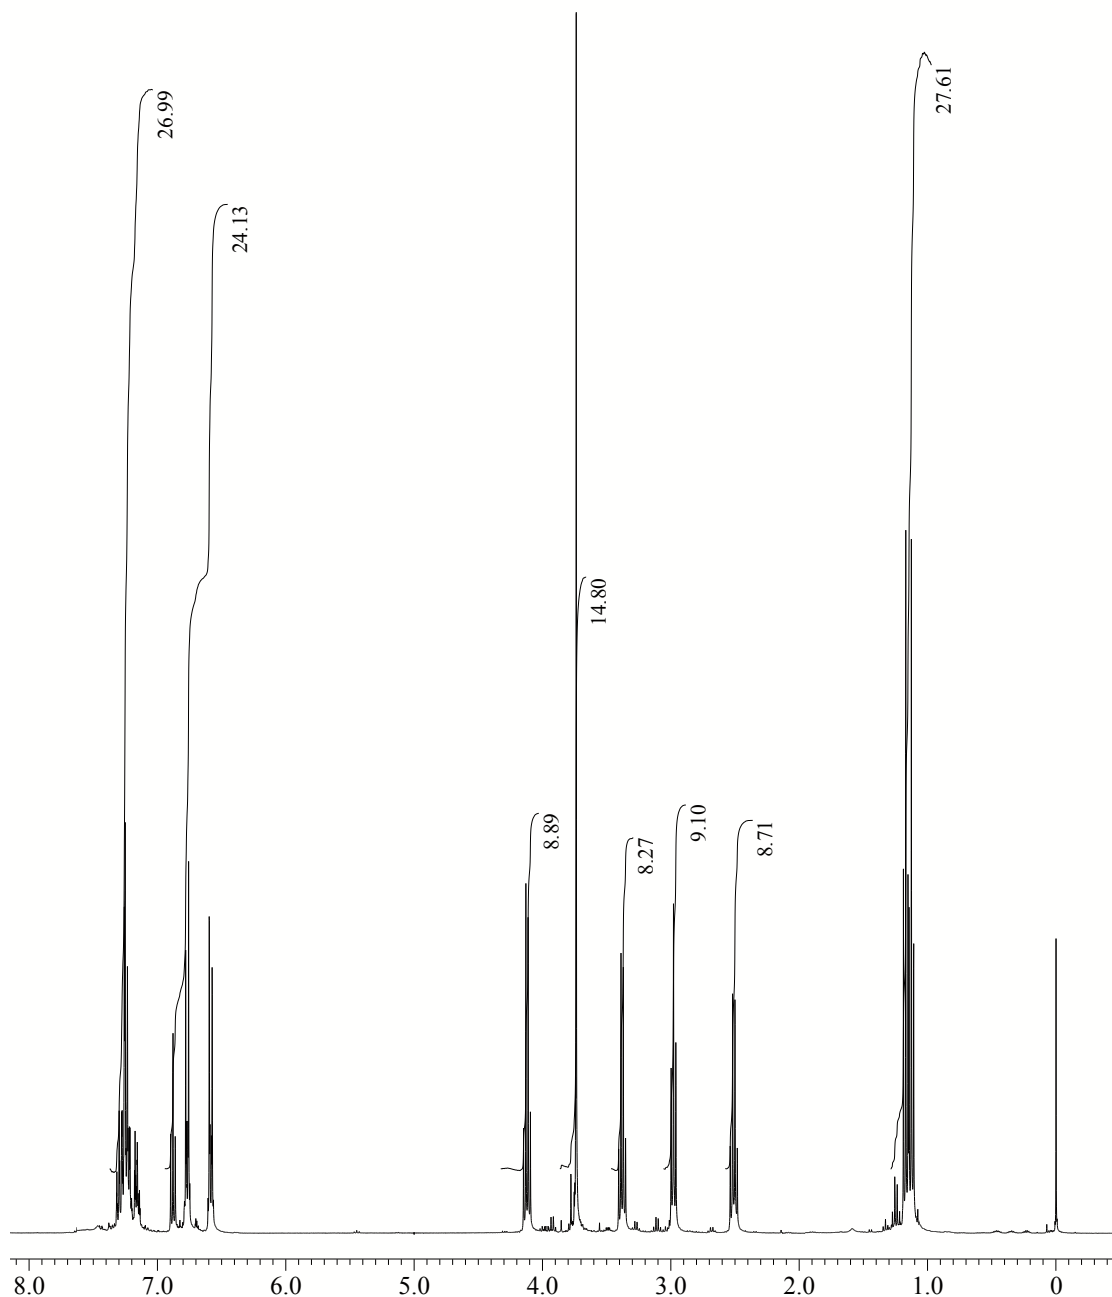

X: parts per Million: 1H



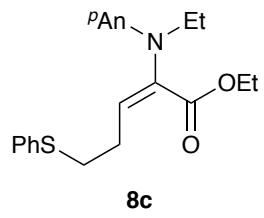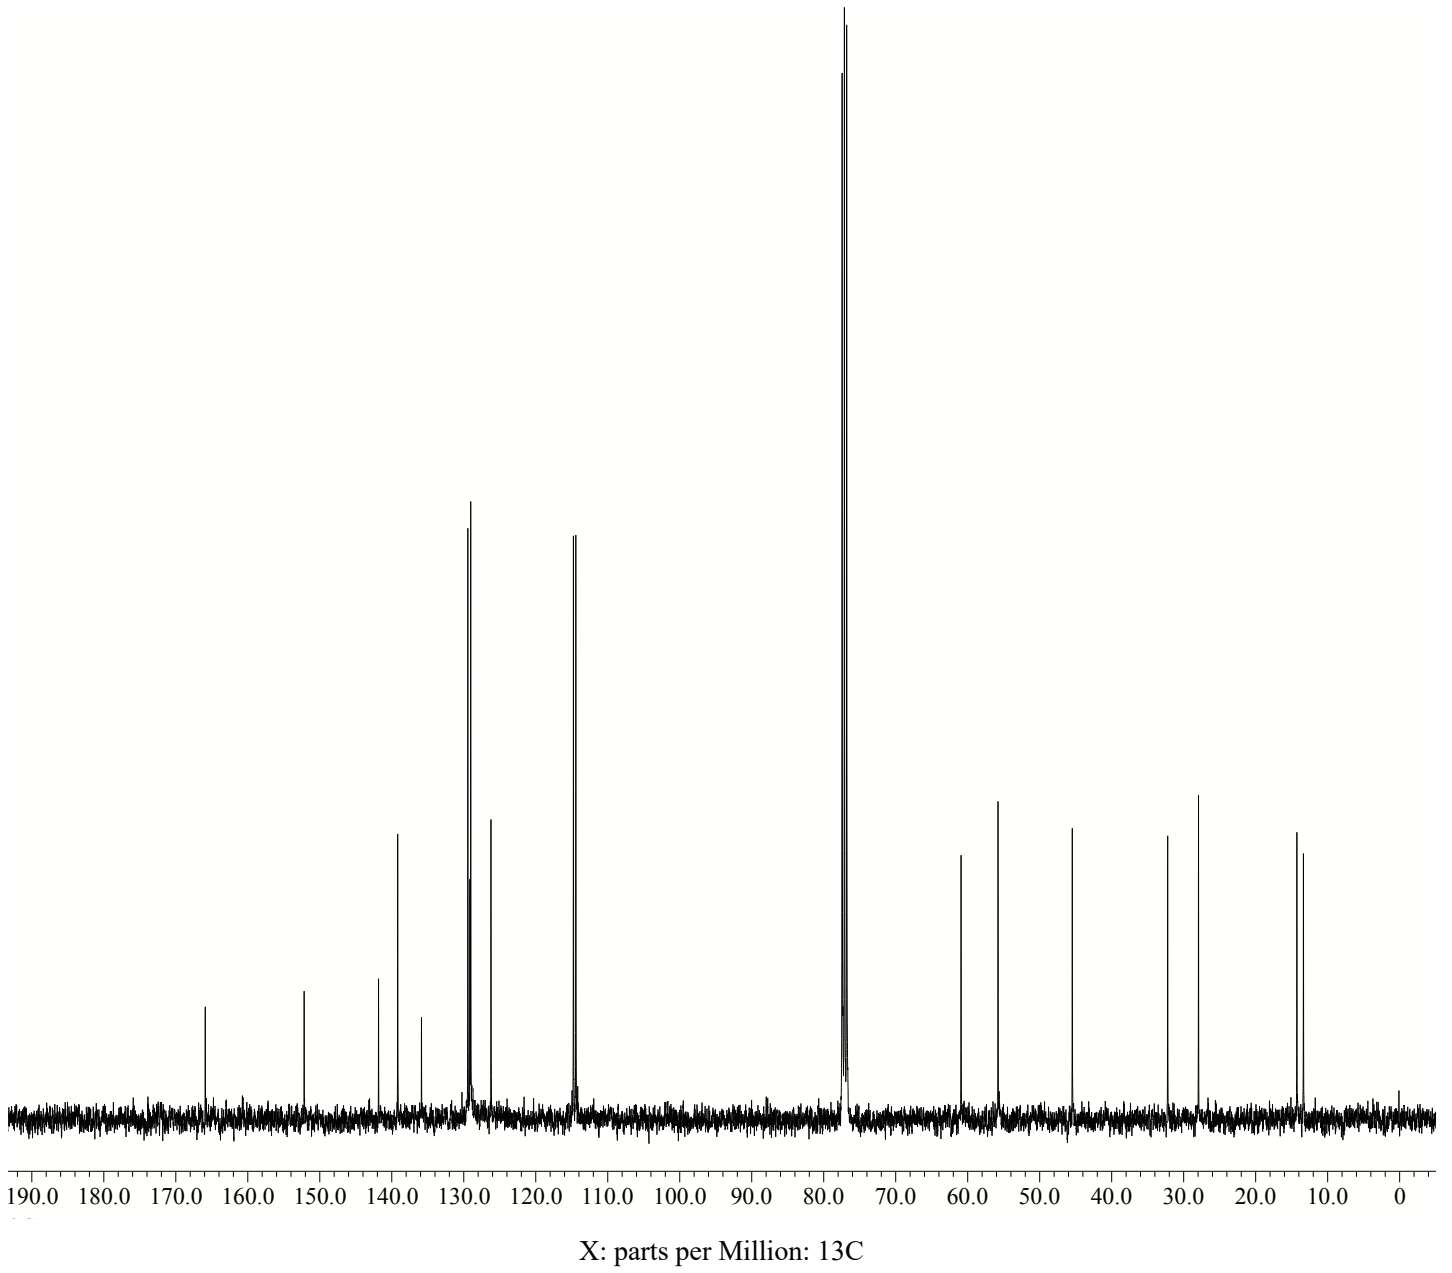

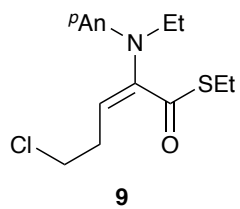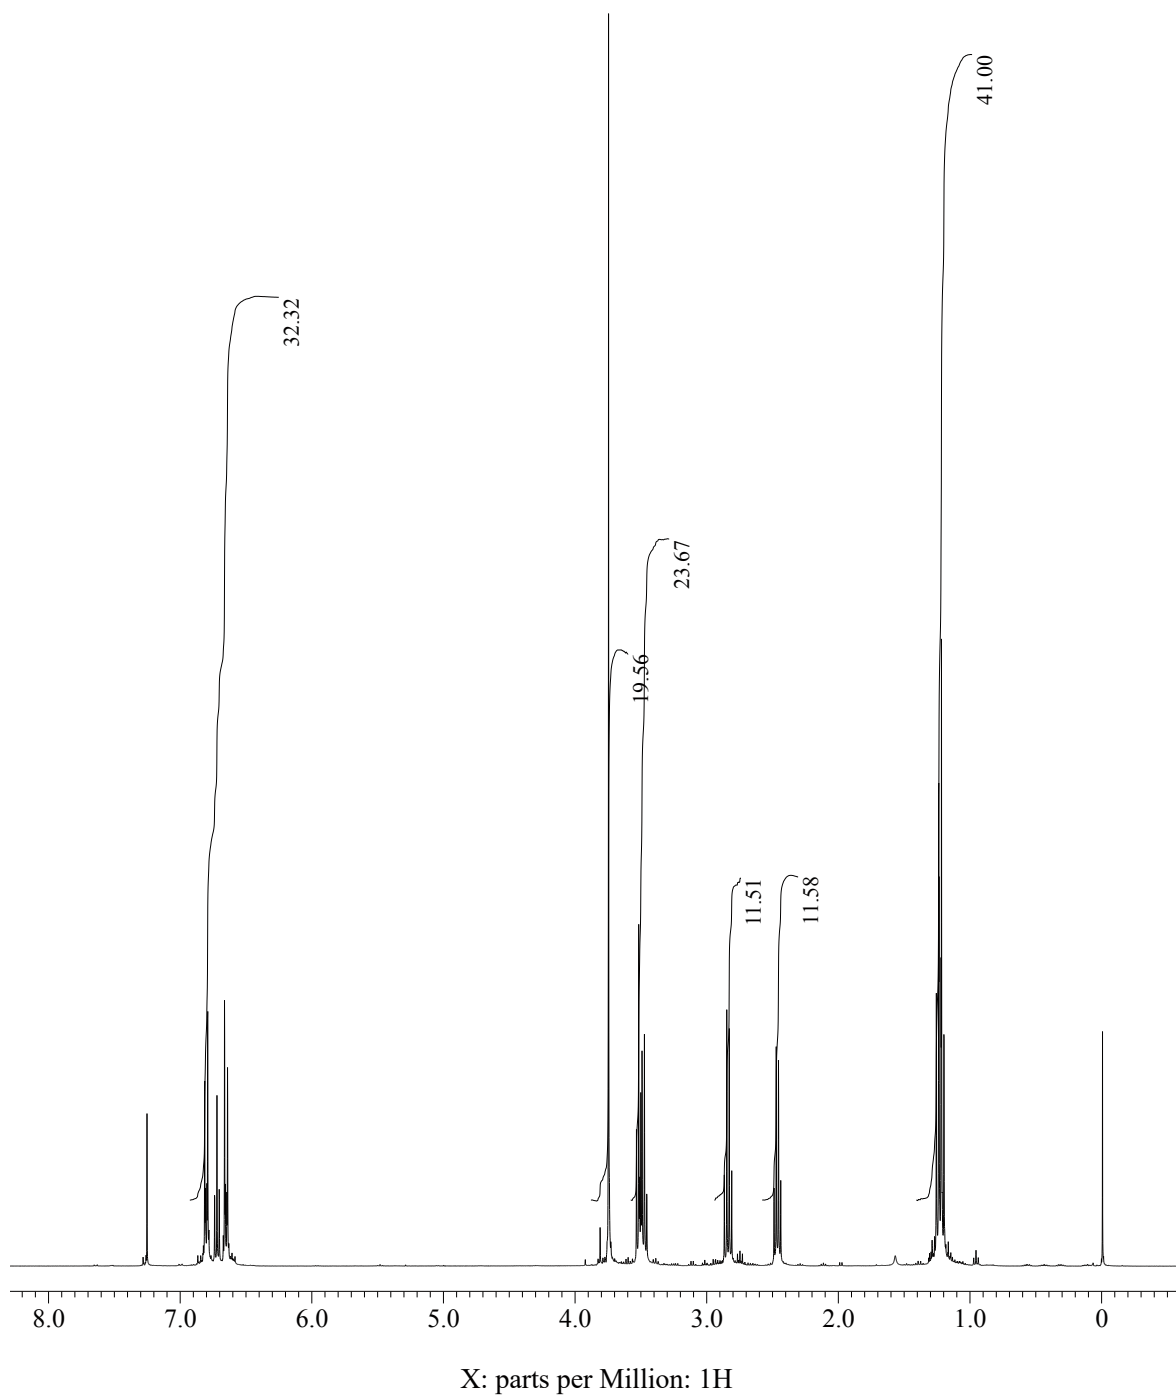

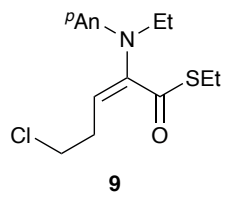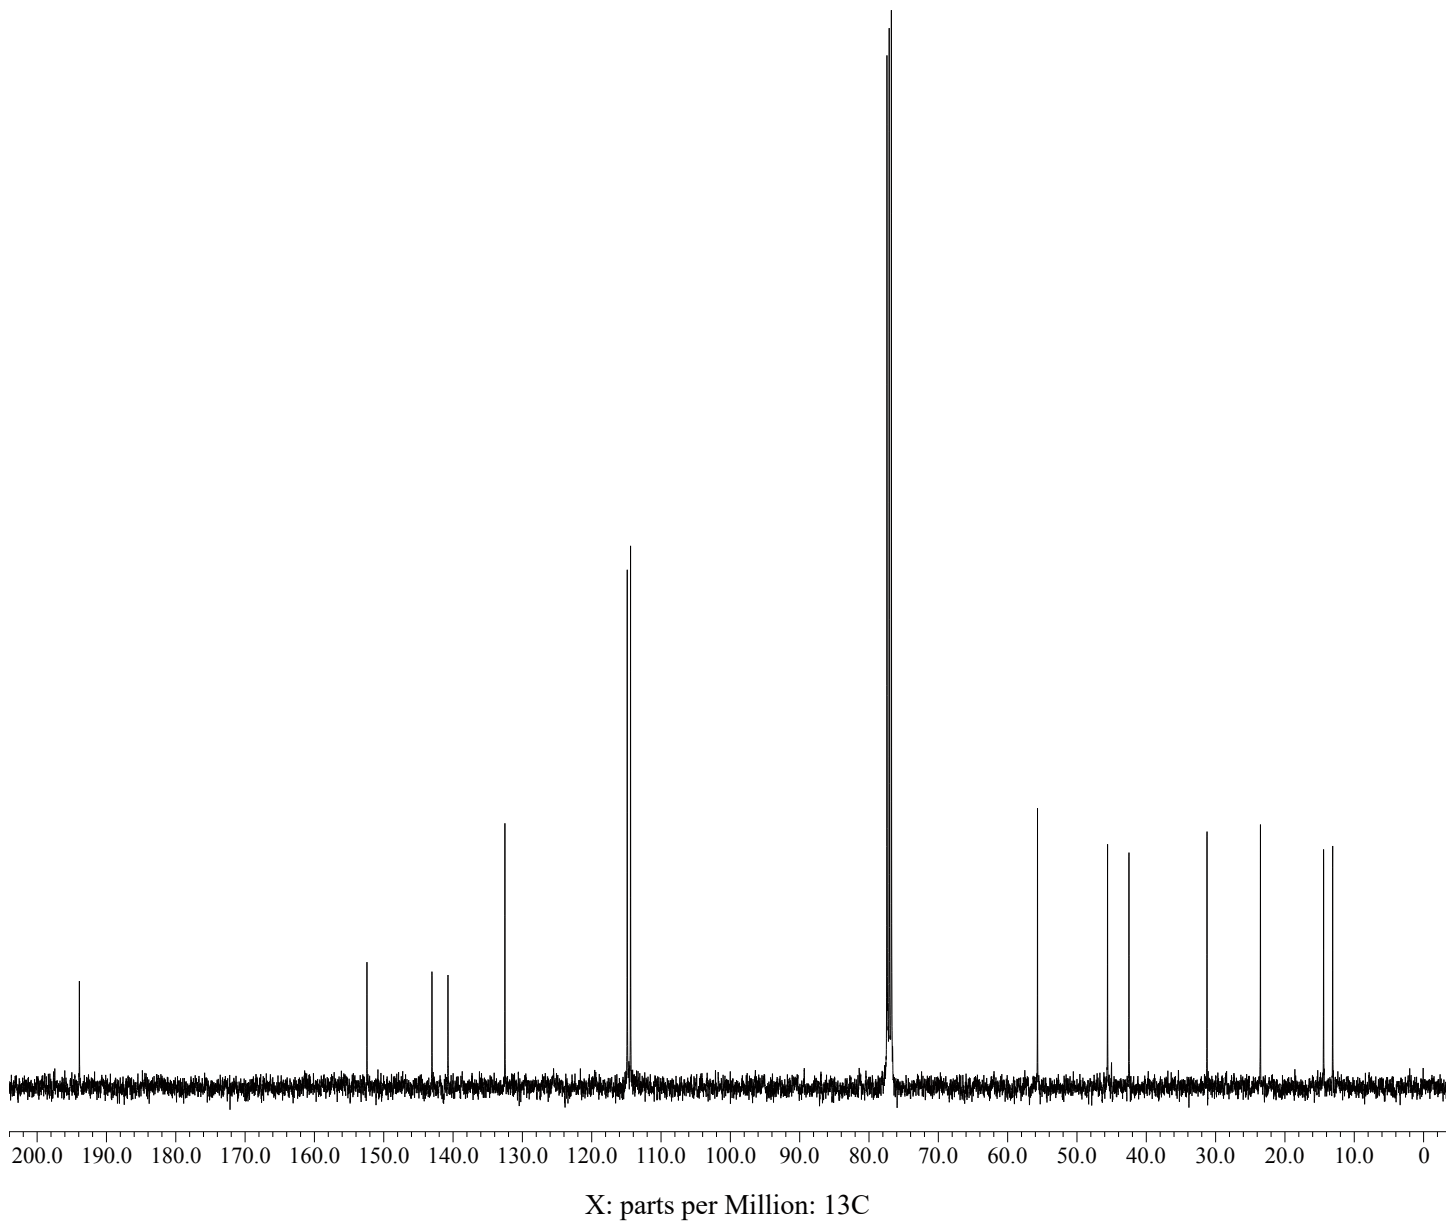

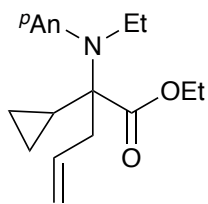

10

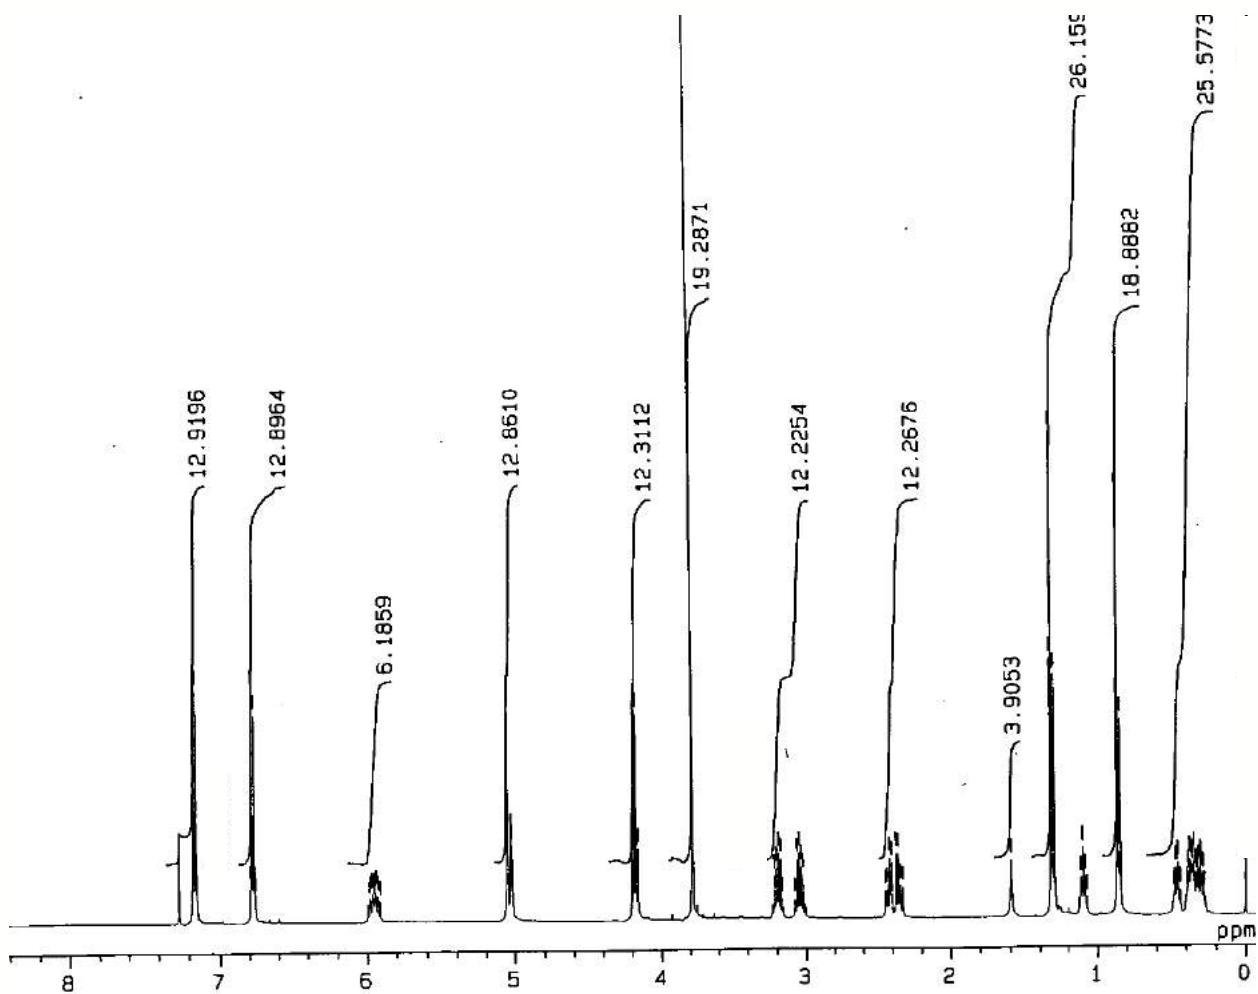

X: parts per Million: 1H

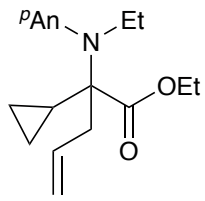

10

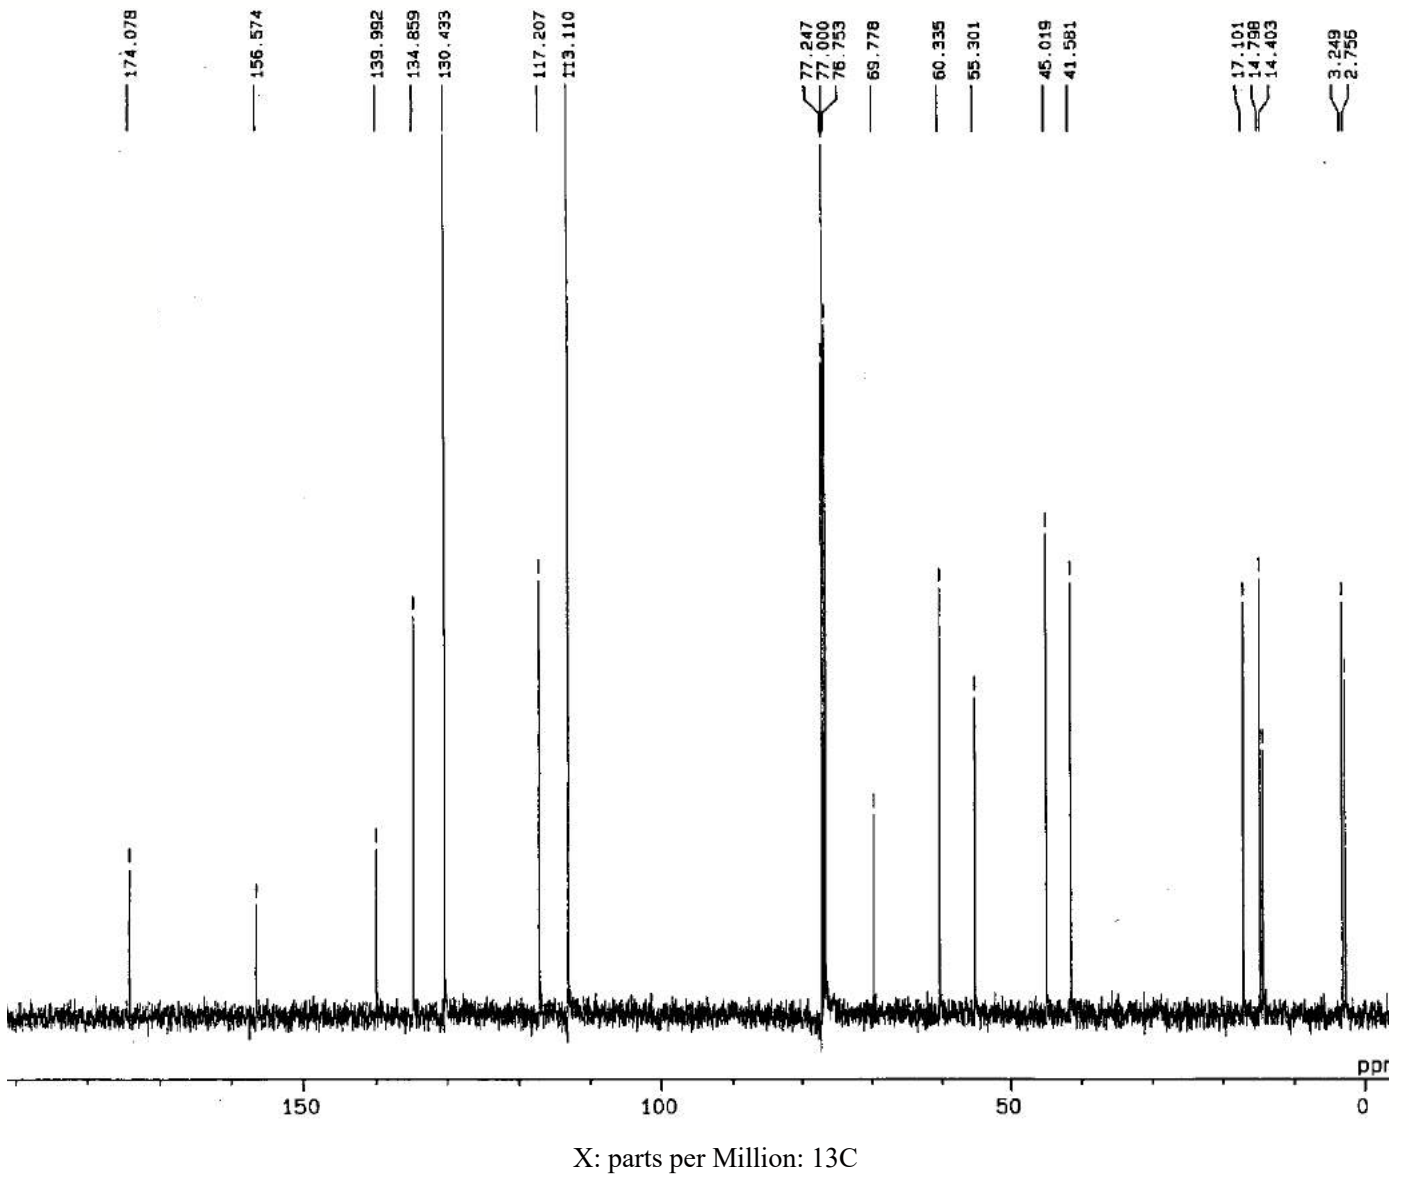

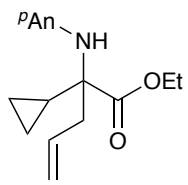

11

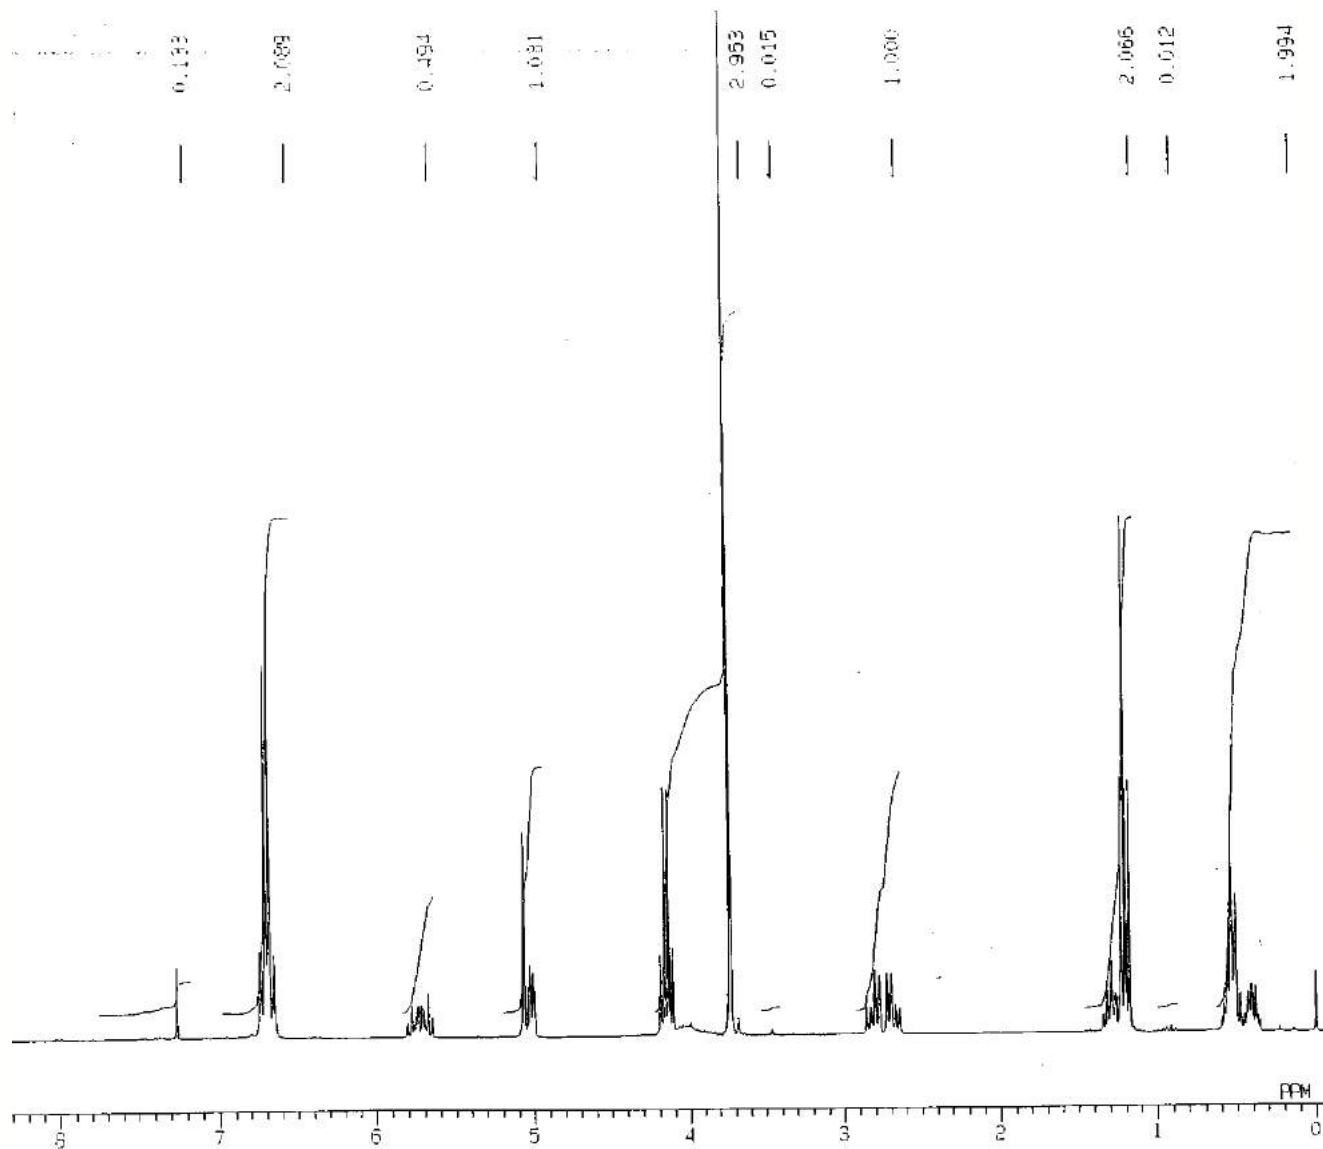

X: parts per Million: 1H

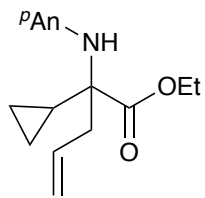

11

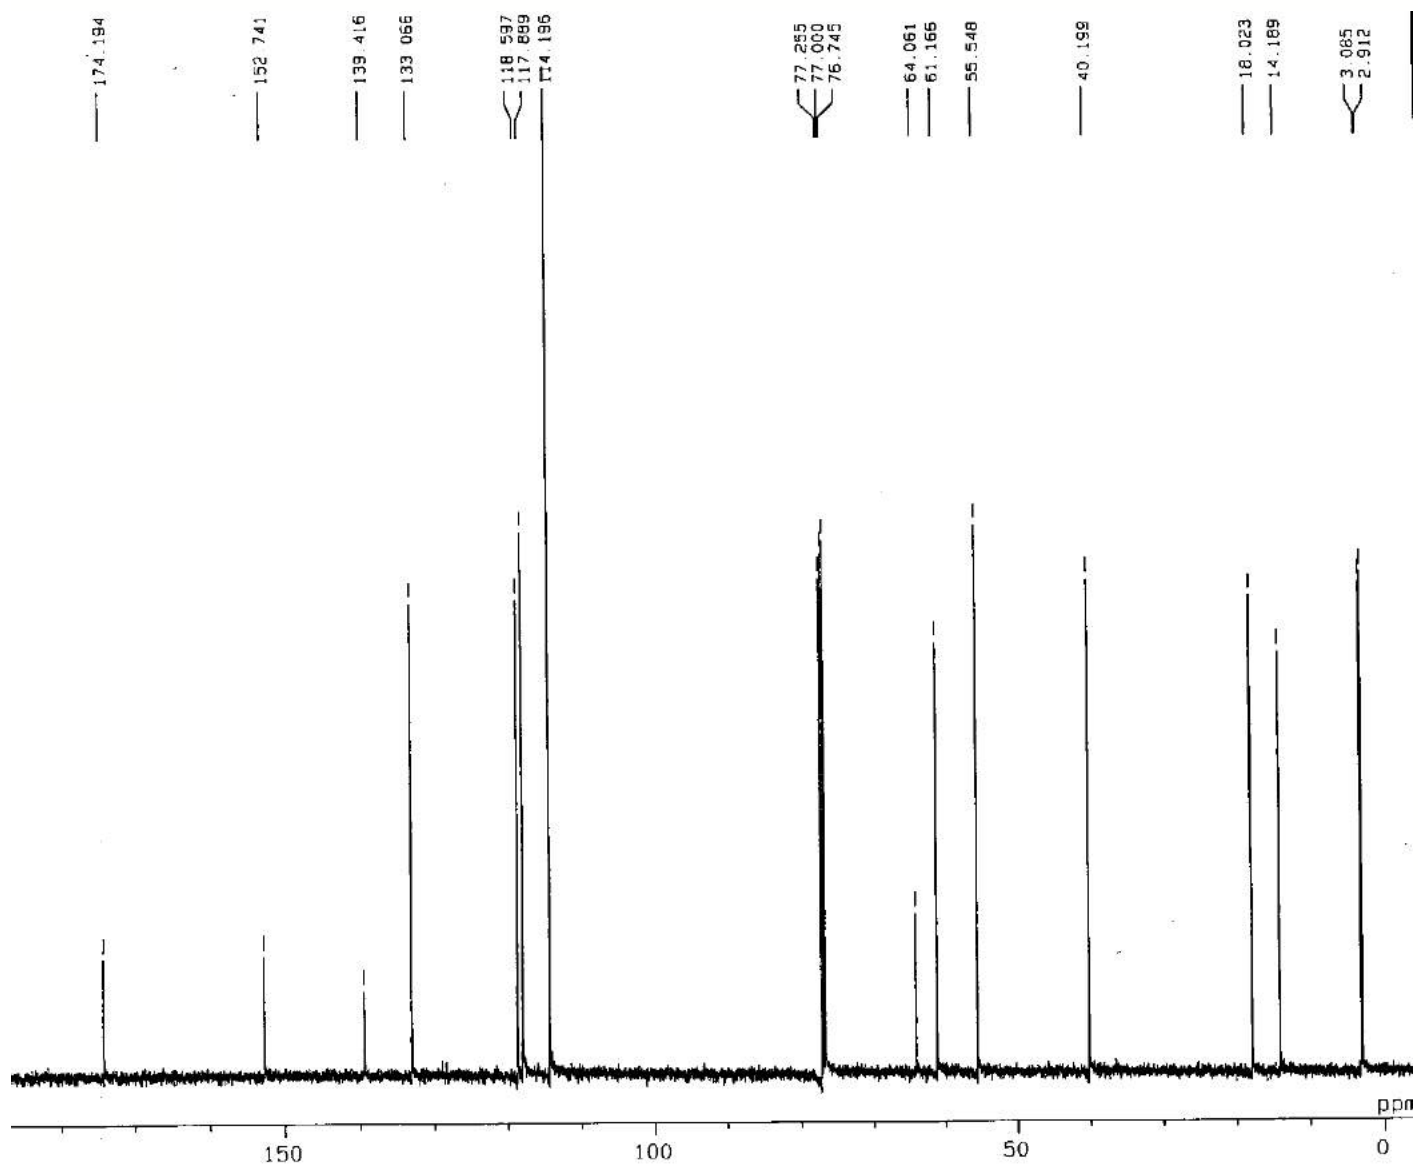

X: parts per Million: 13C
